# 1 **Network analysis reveals strain-dependent** 2 **response to misfolded tau aggregates**

3 Dominic J. Acri<sup>1,2</sup>, Yanwen You<sup>1,3</sup>, Mason D. Tate<sup>1,2</sup>, Brianne McCord<sup>1,4</sup>, A. Daniel  
4 Sharify<sup>1,4</sup>, Sutha John<sup>1,4</sup>, Hande Karahan<sup>1,4</sup>, Byungwook Kim<sup>1,4</sup>, Luke C. Dabin<sup>1,4</sup>,  
5 Stéphanie Philtjens<sup>1,4</sup>, H.R. Sagara Wijeratne<sup>1,5</sup>, Tyler J. McCray<sup>1,2</sup>, Daniel C. Smith<sup>1,2</sup>,  
6 Stephanie J. Bissel<sup>1,4</sup>, Bruce T. Lamb<sup>1,4</sup>, Cristian A. Lasagna-Reeves<sup>1,3,6</sup>, Jungsu  
7 Kim<sup>1,4\*</sup>

8 <sup>1</sup>Stark Neurosciences Research Institute, Indiana University School of Medicine, Indianapolis, IN 46202, USA.

9 <sup>2</sup>Medical Neuroscience Graduate Program, Indiana University School of Medicine, Indianapolis, IN 46202, USA.

10 <sup>3</sup>Department of Anatomy, Cell Biology & Physiology, Indiana University School of Medicine, Indianapolis, IN, USA.

11 <sup>4</sup>Department of Medical and Molecular Genetics, Indiana University School of Medicine, Indianapolis, IN 46202, USA.

12 <sup>5</sup>Department of Biochemistry and Molecular Biology, Indiana University School of Medicine, Indianapolis, IN 46202, USA.

13 <sup>6</sup>Center for Computational Biology and Bioinformatics, Indiana University School of Medicine, Indianapolis, IN, USA.

14 \*Corresponding: Jungsu Kim, [jk123@iu.edu](mailto:jk123@iu.edu)



17 **SUMMARY**

18 Seeding of tau predates the phosphorylation and spreading of tau aggregates. Acri and  
19 colleagues report transcriptomic responses to tau and elevated tau seeds in wild-  
20 derived mice. This paper creates a rich resource by combining genetics, tau biosensor  
21 assays, and transcriptomics.

22 **ABSTRACT**

23 Mouse genetic backgrounds have been shown to modulate amyloid accumulation and  
24 propagation of tau aggregates. Previous research into these effects has highlighted the  
25 importance of studying the impact of genetic heterogeneity on modeling Alzheimer's  
26 disease. However, it is unknown what mechanisms underly these effects of genetic  
27 background on modeling Alzheimer's disease, specifically tau aggregate-driven  
28 pathogenicity. In this study, we induced tau aggregation in wild-derived mice by  
29 expressing *MAPT* (P301L). To investigate the effect of genetic background on the  
30 action of tau aggregates, we performed RNA sequencing with brains of 6-month-old  
31 C57BL/6J, CAST/EiJ, PWK/PhJ, and WSB/EiJ mice (n=64). We also measured tau  
32 seeding activity in the cortex of these mice. We identified three gene signatures: core  
33 transcriptional signature, unique signature for each wild-derived genetic background,  
34 and tau seeding-associated signature. Our data suggest that microglial response to tau  
35 seeds is elevated in CAST/EiJ and PWK/PhJ mice. Together, our study provides the  
36 first evidence that mouse genetic context influences the seeding of tau.

## 37 INTRODUCTION

38 Alzheimer's disease (AD) is the most common cause of dementia and is characterized  
39 by the accumulation of amyloid plaques and neurofibrillary tangles mainly comprised of  
40 aggregated tau protein (Long and Holtzman, 2019). Human genetic studies have  
41 identified variants that implicate several risk genes that influence AD pathogenesis  
42 (Karch and Goate, 2015). As researchers design studies to investigate the role of these  
43 late-onset AD risk genes, they must first decide which pathological outcome(s) to  
44 measure. A combination of transgenic, viral, and xenograft approaches have been  
45 developed to study amyloid-only, tau-only, and amyloid-tau pathogenesis in mice. While  
46 the ultimate goal of these studies is to translate findings to patients with AD, the first  
47 step to translation is understanding what is fundamentally happening in the model  
48 organism.

49 There are a number of promising therapeutic approaches that target tau (Congdon and  
50 Sigurdsson, 2018). Importantly, hyperphosphorylated tau has been shown to cause  
51 neuronal cell death (Lee et al., 2011) and to correlate with measures of cognitive  
52 decline (Arriagada et al., 1992) in humans. To investigate the progression of tauopathy,  
53 the most widely used mouse models express Microtubule Associated Protein Tau  
54 (*MAPT*), the gene which encodes the tau protein. The P301L mutation originally  
55 described in frontotemporal dementia patients (Hutton et al., 1998, Poorkaj et al., 1998)  
56 is often used to induce tau aggregate formation and study tau pathogenesis. Transgenic  
57 models of Tau<sup>P301L/S</sup> (Santacruz et al., 2005, Yoshiyama et al., 2007) and viral models of  
58 Tau<sup>P301L</sup> (Cook et al., 2015, Wegmann et al., 2017) are useful tools to study the  
59 progression of tau pathology and investigate factors that could lead to the risk of  
60 developing any tauopathy, including AD. These models have been shown to  
61 recapitulate key aspects of human tauopathy including behavioral deficits (Lasagna-  
62 Reeves et al., 2016, Cook et al., 2014), neuroinflammation (Yoshiyama et al., 2007),  
63 prion-like proteopathic seeding (Martinez et al., 2022), and propagation from one cell to  
64 another (Dujardin et al., 2022, Rauch et al., 2020, Wegmann et al., 2017, de Calignon et  
65 al., 2012, Woerman et al., 2017).

66 Although the exact mechanism by which tau aggregates form is currently unknown,  
67 there is strong evidence for the role of "tau seeding" as an initiating event. Proteopathic  
68 tau seeds are capable of entering a cell and promoting aggregation in a prion-like  
69 manner (Clavaguera et al., 2009, Frost et al., 2009). Several studies have shown that  
70 seeding precedes tau pathogenesis and can even occur in brain regions where tau  
71 pathology does not usually present (DeVos et al., 2018, Kaufman et al., 2018,  
72 Stopschinski et al., 2021). Several *in vitro* models have been developed that can  
73 measure tau seeding activity from human patients or mouse models of tauopathy  
74 (Bengoa-Vergniory et al., 2021, Holmes et al., 2014, Jin et al., 2022). These seeding  
75 activity assays have assisted in the discovery of novel tau interactors and been used to  
76 investigate phosphorylation patterns associated with tau progression (Martinez et al.,  
77 2022, Mirbaha et al., 2022). Unlike human patients who are genetically diverse, most

78 studies use the same monogenic mouse models. Therefore, the influence of genetic  
79 diversity on tau pathology and seeding has not been thoroughly investigated. With the  
80 hope that these preclinical studies will translate to tau-targeted treatments, there is a  
81 need to better understand how the genetic context of our mouse models affects our  
82 interpretation of tauopathy.

83 The most widely used mouse strain in biomedical research, the C57BL/6J strain (herein  
84 referred to as B6), was established by the Jackson laboratory in the 1920s and became  
85 the strain used to create the mouse reference genome (Mekada et al., 2009, Mouse  
86 Genome Sequencing et al., 2002). While one goal of sustaining a single inbred line is to  
87 limit inter-laboratory artifacts, research into B6 mice reveals that genetic drift and mixed  
88 background breeding have introduced a number of variants since the first draft of the  
89 mouse reference genome (Sarsani et al., 2019, Simon et al., 2013). These variants and  
90 others purposefully introduced by selective breeding are termed “genetic diversity.”  
91 Unique phenotypes arising from mouse genetic diversity can be used as a model for  
92 complex diseases. For example, decreases in pancreatic insulin at 12 weeks of age in  
93 the NOD/ShiLtJ mouse model established this strain as the leading model for research  
94 in Type 1 Diabetes (Makino et al., 1980). Another key strategy in harnessing mouse  
95 genetic diversity is to breed together different mouse strains to create multiparent  
96 panels for genetic mapping (Churchill et al., 2004, Churchill et al., 2012, Peirce et al.,  
97 2004).

98 The founder strains of the Jackson laboratory’s multiparent panels, the Diversity  
99 Outbred and Collaborative Cross mice, include 5 classically inbred and 3 wild-derived  
100 mouse strains (Churchill et al., 2012). These eight founders were selected as they could  
101 be bred together to contain segregating variants every 100-200 base pairs (Churchill et  
102 al., 2004). The most genetically distinct of the eight founder strains are the wild-derived:  
103 CAST/EiJ, PWK/PhJ, and WSB/EiJ (herein referred to as CAST, PWK, and WSB).  
104 These three wild-derived strains are descendants of three different subspecies of *Mus*  
105 *musculus* and contain millions of variants relative to the mouse reference genome  
106 (Yang et al., 2011). For this reason, wild-derived mouse strains have been used as a  
107 resource for modeling the population-level heterogeneity that cannot be investigated  
108 using classical inbred mouse strains alone. Deep characterization of these wild-derived  
109 mice has uncovered genetic (Morgan et al., 2015), behavioral (Kollmus et al., 2020),  
110 and immune (Lilue et al., 2018) differences that are improving our knowledge of mouse  
111 genetics.

112 Previous research has demonstrated the importance of studying these wild-derived  
113 mice in the context of AD. Mice with APP<sup>swE</sup> and PSEN1<sup>de9</sup> transgenes (*APP/PS1*  
114 transgenic: B6.Cg-Tg(Appswe,PSEN1dE9)85Dbo/Mmjax) were backcrossed onto each  
115 of these three wild-derived mouse backgrounds. These mice had higher levels of  
116 Amyloid- $\beta$  (A $\beta$ ) compared to age-matched mice on a B6 background (Onos et al.,  
117 2019). Notably, Onos and colleagues observed an increase in neuroinflammation in the  
118 cortex and hippocampus of PWK mice. This is especially interesting given the important

119 role of neuroinflammation in A $\beta$  accumulation in AD (Efthymiou and Goate, 2017,  
120 Karahan et al., 2021, Mhatre et al., 2015, Schoch et al., 2021). Single cell RNA  
121 sequencing of sorted microglia further demonstrated that the responses of immune cell  
122 subtypes, namely homeostatic microglia and disease-associated microglia (DAMs), are  
123 determined by wild-derived genetic backgrounds (Yang et al., 2021). As the increasing  
124 focus is spent on defining microglial subtypes in studies of neurodegeneration (Keren-  
125 Shaul et al., 2017, Paolicelli et al., 2022), the effect of wild-derived genetic background  
126 could be an important factor in selecting a mouse model that better reflects human  
127 disease. Even though wild-derived backgrounds have been shown to have a large effect  
128 on modeling A $\beta$  pathology, little is known about their effect on modeling tauopathy.

129 Given the known effect of wild-derived mice on modeling A $\beta$  accumulation, we aimed to  
130 investigate the effect of wild-derived mouse genetic background on tauopathy. To  
131 preserve the mouse genetic background, we expressed mutant tau with the P301L  
132 mutation in the brains of B6, CAST, PWK, and WSB mice using intracerebroventricular  
133 injection of an adeno-associated virus (AAV) (Carlomagno et al., 2019, Cook et al.,  
134 2015). This strategy allows us to change the genetic background without the need to  
135 backcross a conventional transgenic mouse with each strain for 10+ generations. In  
136 addition to saving time and money using our viral approach, most importantly, we  
137 ensure that each genetic background is preserved without any possible genetic drift or  
138 the addition of unwanted variants over a multi-year backcrossing experiment. We found  
139 that the presence of seed-competent tau was modulated by genetic background,  
140 independent of human tau expression level. Using bulk mRNA sequencing, we report  
141 transcriptional changes that are shared across genetic backgrounds, changes that are  
142 unique to wild-derived mice, and changes that are associated with the presence of  
143 seed-competent tau (Signatures A, B, and C respectively). Our data serve as a  
144 resource for those studying the pathogenesis of tau and implicate several transcriptional  
145 signatures that are not present when modeling tauopathy in B6 mice.

## 146 RESULTS

147

### 148 Variants in Wild-derived Genetic Backgrounds within AMP-AD Nominated Target 149 Genes

150 CAST, PWK, and WSB mice contain millions of variants across the mouse genome  
151 (Blake et al., 2021). These variants include over 5 million single nucleotide  
152 polymorphisms (SNPs) (Onos et al., 2019), 116 novel genes not present in B6 (Lilue et  
153 al., 2018), and between 250-400 large structural variants (Yalcin et al., 2011). To  
154 identify genetic variants in our mice, we used the Illumina Infinium platform, containing  
155 143,259 probes, designed specifically for wild-derived mice and other founders of the  
156 Diversity Outbred mouse model (Morgan et al., 2015). This allowed us to confirm the  
157 genotype of each genetic background in our laboratory and gave us information about  
158 the SNPs and Copy Number Variants (CNVs) in structurally polymorphic regions of the  
159 mouse genome. To determine which of these variants could be important in AD  
160 research, we focused on target genes nominated by the Accelerating Medicines  
161 Partnership Program for Alzheimer's Disease (AMP-AD) consortium. The genotyped  
162 variants of CAST, PWK, and WSB within the AMP-AD nominated targets were  
163 visualized using a circos plot (Figure 1).

164 In total, we found 5,792 variants in 537 nominated target genes (Supp. File 1A-B).  
165 Across all three wild-derived mice in this study, we found genotyped variants in 401 of  
166 the total 537 nominated target genes. While a large portion of these variant calls were  
167 identical across CAST, PWK, and WSB mice (2,601 out of 5,792), there were a number  
168 of strain-specific variants. For example, within Inositol polyphosphate-5-phosphatase D  
169 (*Inpp5d*;chr1:87620312-87720507), there were five genotyped variants. One SNP was  
170 shared between all three wild-derived mice, three SNPs were shared only by CAST and  
171 PWK, and one SNP was heterozygous in CAST and PWK but homozygous in WSB  
172 (Supp. File 1C). This demonstrates the genetic heterogeneity of these mouse models  
173 within key genes studied in AD.

174 Cytochrome P450 3A43 (*Cyp3a43*; chr5: 137890932-146113285) contained the most  
175 genotyped variants with 563, only 163 of which were shared among all wild-derived  
176 mice. 136 of the 537 AMP-AD target genes did not contain any genotyped variants.  
177 More information about all variants in these wild-derived mice is available on the Mouse  
178 Genome Database (<http://www.informatics.jax.org>). While our description is limited to  
179 those variants genotyped by our selected Illumina Infinium platform, these data suggest  
180 that the genetic heterogeneity of the wild-derived mouse genetic backgrounds could  
181 modulate many genes of interest for the study of AD and related dementias.

### 182 Pilot Study to Determine Sample Size for Viral Approach

183 To preserve the effect of genetic background, we selected to model tauopathy with a  
184 viral approach. Expressing mutant tau without the need to backcross allows us to test  
185 the effect of a "pure genetic background," without the need to re-genotype each  
186 experimental mouse for all variants of interest. We used an AAV-mediated gene

187 expression model, as described before (Carlomagno et al., 2019, Cook et al., 2015, Kim  
188 et al., 2008).

189 To ensure that we would be statistically powered to test the effect of genetic  
190 background, we designed a pilot experiment. One litter of B6 and WSB mice was  
191 injected with AAV-hTauP301L. At 6 weeks of age, we then evaluated the effects of  
192 genetic background on tau seeding activity using the tau seeding assay biosensor  
193 assay. Using an effect size of 20% for the FRET+ signal, a power of 0.8, a group  
194 number of 4, and  $P < 0.05$ , we aimed for a final sample size of at least 8 AAV-  
195 hTauP301L injected mice per genetic background (Supp. Figure 2A-C).

### 196 **Signature A: Core Tau-responsive Signature Across Genetic Backgrounds**

197 To understand the effect that genetic background has on modeling the expression of  
198 human tau, we performed bulk RNA sequencing on the cortex of 6-months-old mice  
199 injected with either AAV-hTauP301L or AAV-eGFP (Figure 2A;  $n = 8/\text{background}$   
200 respectively). Principal component analysis (PCA) demonstrates that the largest  
201 contribution to the variation in the transcriptome is genetic background (Figure 2B).  
202 These data suggest that the genetic variation across genetic backgrounds is the  
203 greatest driver of gene expression. To define differentially expressed genes (DEGs)  
204 between AAV-hTauP301L and AAV-eGFP injected mice, we used adjusted  $P < 0.05$   
205 and a 1.5-fold cutoff for up- or down-regulated genes.

206 Comparisons were made between AAV-hTauP301L and AAV-eGFP injected mice for  
207 each genetic background independently (Supp. Figure 1A-D; Supp. File 1A-D). There  
208 are a number of genes that are specific to each genetic background (Lilue et al., 2018).  
209 Our resource only includes genes that were identified with at least 10 total read counts  
210 across all samples of a given genetic background. We identified a total of 4,784 DEGs  
211 in B6, 5,260 DEGs in CAST, 4,657 DEGs in PWK, 4,958 DEGs in WSB (DEG Set Size,  
212 Figure 2C). Of these DEGs, 2,467 genes were commonly expressed across all genetic  
213 backgrounds and were identified as DEGs in all genetic backgrounds (Yellow  
214 highlighted Intersection, Figure 2C). The Upset plot also shows genes that were  
215 commonly expressed but not DEGs and DEGs shared between different combinations  
216 of genetic backgrounds (Figure 2C). Gene sets unique to each background (i.e. CAST-  
217 only DEGs,  $n = 914$ ) are available in a supplemental table (Supp. File 1E). These data  
218 suggest a large part (2,467 genes) of what we call the “Signature A: core tau signature”  
219 is resistant to the variation between genetic backgrounds.

220 To understand which genes are part of “Signature A”, we performed enrichment  
221 analyses. Kyoto Encyclopedia of Genes and Genomes (KEGG) enrichment analysis of  
222 this gene set (2,467 genes) was significantly enriched for several neurodegenerative  
223 terms (Figure 2D; Supp. Figure 1E; Supp File 2J). As an example, KEGG term  
224 “Pathways of neurodegeneration – multiple diseases” demonstrates a pathway that is  
225 conserved across all genetic backgrounds in this study (Figure 2E). A total of 168 genes  
226 out of the 471 genes in the pathway (“Pathways of neurodegeneration –multiple



227 diseases” KEGG map05022) follow this genetic background-independent effect (Supp.  
228 Figure 1F). For example, *Ube2j1*, *Calm3*, and *Mapk1* genes were lowly expressed  
229 similarly in B6 and all three wild-derived mice injected with AAV-hTauP301L, compared  
230 to the AAV-eGFP injected control group (Figure 2E). These data demonstrate that the  
231 “core tau signature” includes many targets that are already implicated in  
232 neurodegenerative diseases.

### 233 **Signature B: Unique Tau Signature in Wild-Derived Genetic Backgrounds**

234 While the presence of DEGs is informative when comparing genetic backgrounds, we  
235 were also interested to discover novel targets for tauopathy that may be present only in  
236 wild-derived mice. To do this, we performed DEG analysis using the genetic  
237 background as a covariate with injection type  
238 (~Injection+GeneticBackground+Injection:GeneticBackground). This approach differs  
239 from the differential expression analysis to identify Signature A as it identifies DEGs that  
240 are not shared across the genetic background in response to tau. A total number of 79  
241 DEGs were identified in CAST (Effect: Tau.CAST; Supp. File 1F), 51 DEGs in PWK  
242 (Effect: Tau.PWK; Supp. File 1G), 53 DEGs in WSB (Effect: Tau.WSB; Supp. File 1H).  
243 These data suggest that there exist some novel responses to Tau present only in wild-  
244 derived mice.

245 By deciding to calculate DEGs with a genetic background as a covariate, we were able  
246 to identify tau response genes that are specific to the wild-derived strains. A Venn  
247 diagram of the DEGs shows how many genes are shared across these wild-derived  
248 strains (Figure 3A). There were 17 genes shared by CAST, PWK, and WSB (Figure 3B)  
249 that were not differentially expressed in B6 mice. As an example, Cilia and flagella  
250 associated protein 74 (*Cfap74*) was up-regulated in wild-derived mice injected with  
251 AAV-hTauP301L compared to AAV-GFP injected mice of the same genetic background  
252 (Figure 3C). As more risk genes are characterized in the study of tauopathy, it is critical  
253 that these genes can be modeled on backgrounds other than B6.

254 Uniquely down-regulated (Figure 3D) or up-regulated (Figure 3E) DEGs in just one wild-  
255 derived strain are rare phenomena, especially in comparison to Signature A which is  
256 comprised of 2,467 DEGs. While there has been no precedent for private DEGs that  
257 have a large effect on modeling tauopathy, our data shows some divergent responses  
258 to tau. Although the number of wild-derived specific DEGs in Signature B is not large  
259 enough to reach significance in enrichment analyses, taken together, these 183 genes  
260 in Signature B are enriched for several pathways that have not been studied well in the  
261 context of tauopathy (Supp. File 2K).

### 262 **Tau Seeding Activity is Modulated by Genetic Background Independent of Tau 263 Expression Level**

264 To investigate whether the pathogenesis of tau aggregates differs across genetic  
265 backgrounds, we decided to measure the proteopathic tau seeding activity using an *in*  
266 *vitro* biosensor cell assay. A cell line expressing the repeat domain (RD) of tau

267 conjugated to either a cyan fluorescence protein (CFP) or yellow fluorescent protein  
268 (YFP) was transfected with brain lysate from AAV-hTauP301L mice of each genetic  
269 background. Fluorescence resonance energy transfer (FRET) signal occurs when tau  
270 seeds form due to the proximity of CFP and YFP molecules. FRET+ signal is then  
271 measured by fluorescence activated cell sorting (FACS) as a proxy for tau seeding  
272 activity (Figure 4A). Sample size was determined based on our pilot experiment (Supp.  
273 Figure 2A-C) in order to design the current study (Supp Figure 2D).

274 To ensure consistency in viral expression of the hTauP301L, we measured human  
275 *MAPT* expression from the cortex of B6, CAST, PWK, and WSB mice. We found no  
276 significant effect of genetic background on the expression of Tau by our AAV construct  
277 (Figure 4B;  $F_{3,66} = 0.234$ ,  $p = 0.87$ ). Qualitative analysis of regional human tau  
278 expression (Supp. Figure 2E), the presence of AT180+ (pThr231/pSer235) aggregates  
279 (Supp. Figure 2F), and specific HT7+ bands (Supp. Figure 2G) suggest no effect of  
280 genetic background. Genetic background did not affect the levels of total tau and  
281 pTau231 (Supp. Figure H). These data suggest that the genetic variations across  
282 different mouse genetic backgrounds do not influence our ability to express tau using  
283 intracerebral ventricle AAV injection.

284 Interestingly, genetic background significantly affected tau seeding activity when we  
285 used cortical tissue lysates as seeding agents. Percent FRET+ events measured by  
286 flow cytometry were modulated by genetic background (Figure 4C;  $F_{3,78} = 9.237$ ,  $p =$   
287  $2.67 \times 10^{-5}$ ). Tukey Honest Significant Difference (HSD) post-hoc testing revealed a  
288 significant increase in PWK and CAST mice relative to AAV-hTauP301L-injected B6  
289 controls ( $p < 0.001$ ). However, there was no significant difference between B6 and WSB  
290 AAV-hTauP301L-injected mice ( $p > 0.05$ ). Unlike tau seeding activity from cortical  
291 lysates, no effect of genetic background on tau seeding activity was observed with  
292 hippocampal tissue lysates (Supp. Figure 2I). To ensure the rigor of our analysis, we  
293 replicated our tau seeding assay data. The replication of tau seeding activity assay  
294 showed a high correlation between technical replicates in the cortex ( $R^2 = 0.7988$ ) and  
295 hippocampus ( $R^2 = 0.8701$ ; Supp Figure 2J). Taken together, our data suggest that the  
296 genetic heterogeneity across wild-derived mice exacerbates the prion-like action of tau,  
297 specifically in the brain cortex.

### 298 **Signature C: Tau Seeding-Associated Signature in PWK and CAST strains**

299 The finding that tau seeding activity varies across genetic backgrounds compels us to  
300 ask whether there is an associated tau seeding signature. We performed Weighted  
301 Gene Co-expression Network Analysis (WGCNA) to investigate which genes may be  
302 correlated with this difference in seeding activity. Using our FRET data as a trait for  
303 “module-trait” relationship analyses, we aimed to elucidate which genes may be  
304 involved in tau seeding. We identified 60 modules of co-expressed genes (Supp. File 11;  
305 Supp. Figure 3A-C) and tested their correlation to traits including: whether mice were  
306 injected with AAV-eGFP or AAV-hTauP301L (Injection), whether mice were B6 or one  
307 of the wild-derived backgrounds (wild-derived), biological sex (Sex), and seeding activity

308 (FRET). Of these 60 modules, 11 were significantly associated with seeding activity  
309 (Supp. Figure 3D,  $p < 0.05$ ). Importantly, none of the 11 modules demonstrated a  
310 significant effect of sex.

311 Each of these 11 modules with a significant Module:Trait<sub>FRET</sub> relationship may contain  
312 genes that explain the increase in seeding activity seen in PWK and CAST mice. We  
313 focused on those that were most highly associated via Pearson Correlation (Figure 5A,  
314  $R^2$ : Positively Correlated 0-1, Negatively Correlated -1-0). Although the cyan module  
315 was most positively correlated to the FRET measurement (Figure 5A,  $R^2 = 0.65$ ,  $p = 2 \times$   
316  $10^{-8}$ ), it showed no effect of wild-derived background ( $R^2 = 0.0097$ ,  $p = 0.9$ ). The  
317 darkorange module is the second most positively correlated to FRET measurement  
318 (Figure 5B,  $R^2 = 0.54$ ,  $p = 7 \times 10^{-6}$ ) and showed a significant effect of wild-derived  
319 background ( $R^2 = 0.27$ ,  $p = 0.03$ ). Eigenvalue of the genes in the both modules  
320 demonstrates that the effect of wild-derived background was not present in the cyan  
321 module (Figure 5A), but did appear in the darkorange module (Figure 5B). For this  
322 reason, we focused on the darkorange module to describe the effect of genetic  
323 background on tau seeding activity “Signature C.”

324 The darkorange module contains a total of 666 genes that we found to be associated  
325 with the effect of genetic background on tau seeding activity (Figure 5C, highlighted in  
326 orange). A similar effect of the genetic background was found via WGCNA when  
327 modeling A $\beta$  (Onos et al., 2019). In comparison to their 35-gene module, we found that  
328 19 of their genes were significantly enriched in our darkorange module (Figure 5C,  
329 highlighted in purple; Fisher exact test,  $p = 1.62 \times 10^{-19}$ ). Interestingly, these genes that  
330 are affected by genetic background in both amyloid and tau studies include key  
331 microglial genes (*Trem2*, *Tyrobp*, *Tgfb2*) and the complement cascade genes (*C1qa*,  
332 *C1qb*, *Pros1*) (Figure 5C). This finding suggests that both pathways are sensitive to  
333 genetic context when modeling both hallmarks of AD.

334 We further characterize this tau seeding-associated signature using enrichment  
335 analysis. Enrichment analysis of these genes revealed KEGG terms associated with  
336 immune response (Figure 5E) and WikiPathways associated with microglia (Figure 5F).  
337 These data suggest that the immune system, specifically microglia, may be implicated  
338 in the increase in seed-competent tau observed in CAST and PWK mice. Additional  
339 enrichment analyses of Signature A, Signature B, and Signature C can be found in the  
340 supplemental information (Supp. File 2J-L).

## 341 DISCUSSION

342 Recent studies in AD have shown that mouse genetic background can modulate A $\beta$   
343 accumulation (Onos et al., 2019), immune response (Yang et al., 2021), and tau  
344 propagation (Dujardin et al., 2022). To better understand how genetic background  
345 influences tauopathy, we aimed to create a resource of core- and unique-transcriptional  
346 signatures to tau expression based on mouse genetic background. Additionally, we  
347 were interested in determining if the seeding activity of tau was modified by genetic  
348 background. To better understand the pathogenicity of Tau aggregates, it is important to  
349 investigate the initial seeding of tau and subsequent spreading/propagation, similar to  
350 studying A $\beta$  in AD and  $\alpha$ -synuclein in Parkinson's disease (Peng et al., 2020). We report  
351 that the cortex of wild-derived CAST and PWK mice has significantly higher prion-like  
352 proteopathic seeding activity of tau compared to that of B6 controls. To better  
353 understand the mechanisms involved, we performed a network analysis that implicated  
354 microglia in this strain-specific seeding activity. Our data suggest that mouse genetic  
355 background is an important factor when studying immune responses to pathological tau  
356 species.

357 For this study, we selected three wild-derived genetic backgrounds (CAST, PWK, and  
358 WSB) to compare to B6. Using a genotyping array, gigaMUGA, we report that these  
359 three wild-derived strains contain many variants in the nominated targets from the AMP-  
360 AD database (Figure 1). A comprehensive list of all variants in these wild-derived mice  
361 and 85 other strains can be found in the Jackson Laboratory's Mouse Genome  
362 Database (Blake et al., 2021). Transcriptomic data from Onos and colleagues showed a  
363 compelling effect of these three wild-derived strains on amyloid accumulation (Onos et  
364 al., 2019, Yang et al., 2021). To compare the response to the two hallmarks of AD,  
365 amyloid and tau, we decided to investigate these same mouse strains. Our data  
366 suggest that these wild-derived strains are an ideal resource for investigating the  
367 contribution of genetic variation to the study of AD and other tauopathies.

368 With AD mouse models, transcriptional signatures have been an important experimental  
369 readout. Several studies have shown that this hypothesis-generating, unbiased readout  
370 can be used to investigate A $\beta$  accumulation (Sierksma et al., 2020), region-specific  
371 expression of tau (Castanho et al., 2020), and activated immune response (Kang et al.,  
372 2018). Previously, genetic background has been shown to influence the amount of tau  
373 and the presence of at least one phospho-epitope in tau transgenic models (Eskandari-  
374 Sedighi et al., 2017, Yanagisawa et al., 2021, Bailey et al., 2014). However, no  
375 transcriptional information or mechanism of action has ever been proposed. To test the  
376 effect of wild-derived genetic background and generate hypotheses about the  
377 responsible mechanisms, we used transcriptional signatures as our main readout.  
378 Importantly, our study shows that the core transcriptional response to tau across  
379 different genetic backgrounds is enriched for pathways of neurodegeneration (Figure 2).  
380 This finding suggests that the fundamental pathways involved in studying mouse  
381 models of dementia do not change across genetic backgrounds. As preclinical studies

382 continue to make direct comparisons between human and mouse transcriptomics  
383 (Monzon-Sandoval et al., 2022, Onos et al., 2022), our list of core genes can be  
384 interpreted as robust tau-responsive genes for future study.

385 However, we argue that it is just as important to understand what transcriptomic  
386 response is modulated by different genetic backgrounds. Previous studies of *Trem2* on  
387 mixed background mice indicated an allele inherited by the SJL strain that unknowingly  
388 introduced a missense mutation (Yang et al., 2021). In previous studies, we have  
389 addressed this issue by excluding mice that are homozygous for the SJL allele from  
390 analysis (Karahan et al., 2021). However, for investigators planning to study novel risk  
391 genes, it would be impossible to control for every naturally occurring variant. We  
392 propose using these differences, specifically in the study of tauopathy, to our  
393 advantage. Should researchers consider focusing on any gene of interest, it is critical  
394 that we first understand what aspects of mouse biology are causing the genetic  
395 background to modulate tau phenotypes. We report a unique or “segregating” response  
396 to tau in wild-derived mice (Figure 3). For example, WSB mice appear to have a unique  
397 down-regulation in two genes involved in motor transport, *Kif14* and *My11* (Figure 3D).  
398 For those studying the role of motor transport in AD (Gan et al., 2020), the WSB  
399 background may provide insights that would not be observed using B6 mice. Other  
400 conclusions from the wild-derived unique responses could explain unexpected negative  
401 data when using B6 mice. This would be one of the barriers to translating research  
402 findings into humans

403 Lastly, to understand if genetic background modulates the pathogenicity of tau, we  
404 investigated the effect of mouse strain difference on the tau seeding activity. We found  
405 an increase in tau seeding activity in the cortex of CAST and PWK mice (Figure 4).  
406 More research is necessary to understand why this increase in seeding activity is  
407 occurring and why we observed the effect of genetic background only in the cortex and  
408 not in the hippocampus. It is possible that modifiers or interactors of tau exist in CAST  
409 and PWK mice. Our previous research has demonstrated that interactors like Bassoon  
410 (*Bsn*) contribute to the ability of tau to seed and induce neurotoxicity (Martinez et al.,  
411 2022). As a pathological readout, seeding activity has been shown to identify the action  
412 of high molecular weight tau (Martinez et al., 2022) and even differentiate between  
413 specific conformers in 3R/4R tau diseases (Kraus et al., 2019). Importantly, our network  
414 analysis identified a module of genes associated with this increase in CAST and PWK  
415 mice (Figure 5). Our enrichment analysis suggests the importance of microglia (Figure  
416 5D, E). However, this finding is based on bulk transcriptomic data from wild-derived  
417 mouse strains. An increasing amount of work is currently going into identifying disease-  
418 and context-specific glial states (Keren-Shaul et al., 2017, Paolicelli et al., 2022,  
419 Ezerskiy et al., 2022). Single cell RNA sequencing will be necessary to better  
420 understand which microglia cell types are involved in this phenotype. Interestingly, we  
421 see a considerable overlap when comparing the tau-seeding associated genes in wild-  
422 derived mouse strains to a previous study of amyloid response in wild-derived strains  
423 (Onos et al., 2019). These include *Trem2*, *Tyrobp*, *Tgfbr2*, and *Cd68*.

424 In conclusion, we have described strain-specific variants identified via Illumina Infinium  
425 platform and three transcriptional signatures identified via RNA sequencing. First, a core  
426 tau-responsive signature that is not affected by genetic background (Signature A).  
427 Second, a unique response to tau that may indicate wild-derived mice should be used to  
428 study specific risk genes (Signature B). Third, a tau seeding activity associated  
429 signature that implicates microglia (Signature C). Our data provide a resource for  
430 investigating tau in mouse models of AD and other tauopathies (Figure 6). Given that  
431 most therapeutic approaches are tested in mice before progressing to clinical trials,  
432 including wild-derived mice may enhance the translatability to treating patients with  
433 different genetic backgrounds.

## 434 **MATERIALS AND METHODS**

### 435 **Mouse strains and Genotyping**

436 This study was designed to investigate the role of genetic background in the  
437 pathogenesis of tauopathy. To achieve this, we purchased breeders from genetically  
438 diverse mouse strains from the Jackson laboratory (C57BL6/J: Stock #000664  
439 ,CAST/EiJ: Stock #000928 ,PWK/PhJ: Stock #003715, WSB/EiJ: Stock #001145). All  
440 procedures and animal work were approved by the Indiana University School of  
441 Medicine Institutional Animal Care and Use Committee (Protocol 21149).

442 Tail samples from a pilot cohort were collected and sent to GeneSeek (Neogen) for  
443 genotyping on the gigaMUGA (Mouse Universal Genotyping Array) platform. This array  
444 contains 143,259 SNP and CNV markers that were selected to be informative in wild-  
445 derived mice and multiple *Mus* species (Morgan et al., 2015). The results published in  
446 this study are in part based on data obtained from Agora  
447 (<https://agora.adknowledgeportal.org/>), a platform initially developed by the NIA-funded  
448 AMP-AD consortium that shares evidence in support of AD target discovery. In argyle  
449 (Morgan, 2015), variants were recoded and filtered based on the position of the AMP-  
450 AD nominated target genes (Accessed March 1, 2021). Variants were then visualized  
451 using RCircos (v1.2.2).

### 452 **Intracerebroventricular Injections of Adeno-associated Virus**

453 To model tau aggregation, we injected mice of each genetic background with either  
454 AAV-hTauP301L (AAV9-CBA/CMV-hTauP301L-WPRE-polyA) or AAV-eGFP (AAV9-  
455 CBA/CMV-eGFP-WPRE-polyA). Sample size was determined by the pilot study  
456 described in the results section. Final sample size reached our requirement based on  
457 power analysis (B6 = 20, CAST = 20, PWK = 19, WSB = 24). We selected AAV9 which  
458 has been shown to have high intracellular expression without an effect of mouse genetic  
459 background (He et al., 2019).

460 A full protocol for this approach was previously published (Kim et al., 2014, Passini et  
461 al., 2003). In brief, breeder cages were checked three times daily to ensure injection  
462 occurred between 12-24 hours after birth (Postnatal Day 0, P0). P0 mice were cryo-  
463 anesthetized for 8 minutes on ice. Using a 32-gauge needle, 2 millimeters deep  
464 injections were made into each lateral ventricle (0.8-1mm later from the sagittal suture  
465 and halfway between lambda and bregma) at a 45-degree angle. A total of 2  $\mu$ L of virus  
466 were injected per ventricle ( $4 \times 10^{10}$  viral particles/mouse) to express each construct.  
467 The injection was performed slowly, and the needle is held in place for an additional 30  
468 seconds. Upon removal of the needle, if more than 0.2  $\mu$ L of the virus leaks out of the  
469 injection site, the animal is immediately euthanized. Surviving mice were placed on a  
470 warming pad until the pup begins to move and were promptly returned to their parent  
471 cage.

### 472 **Tissue harvesting and sample preparation**

473 At six months of age (182.1 +/- 4.9 days, mean +/- standard deviation), mice were  
474 anesthetized using carbon dioxide for 2.5 minutes. Brains were promptly removed, and  
475 the left hemisphere was fixed in 4% paraformaldehyde for 24 hours at 4°C to be stored  
476 for histology. Tissue samples were embedded in paraffin and sectioned at Histology Lab  
477 Service Core at the Indiana Center for Musculoskeletal Health. Five-micrometer-thick  
478 coronal sections (at Bregma -1.46, -1.94, and -2.46 mm) were transferred to charged  
479 microscope slides and stored at room temperature. The Anterior Cortex, Posterior  
480 Cortex, Hippocampus, and Cerebellum were dissected from the right hemisphere and  
481 flash-frozen with liquid nitrogen. Samples were stored at -80°C.

## 482 **Protein preparation**

483 Samples were weighed and prepared in 1X Tris-buffered saline (TBS) at 100 mg of  
484 tissue per milliliter of lysate. After a brief gentle mechanical dissociation, samples were  
485 aliquoted for either RNA or protein extraction. The aliquot designated for protein  
486 extraction was homogenized via sonication and centrifuged at maximum speed for 15  
487 minutes at 4°C. The supernatant, referred to as “TBS-soluble,” was then normalized to  
488 2.0 mg/mL via Bicinchoninic Acid (BCA) assay (Thermo Scientific) and stored at -80°C  
489 until analyzed.

## 490 **Tau-seeding assay**

491 The seeding assay was performed using TauRD P301S FRET Biosensor Cells (Holmes  
492 et al., 2014). In brief, we obtained HEK293-T cells expressing truncated TauP301S  
493 containing only the Repeat Domain (RD) fused to either Cyan- or Yellow-Fluorescent  
494 Protein (CFP, RYP) (ATCC CRL-3275). These biosensor cells were plated in a 96-well  
495 plate at 30,000 cells per well and incubated at 37°C overnight. After 24 hours, cells  
496 were transfected with 20 µg of TBS-soluble brain lysate using Lipofectamine 2000. After  
497 an additional 48 hours at 37°C, cells were harvested and FRET+ signal was measured  
498 via Flow Cytometry (BD LSRFortessa X-20 with High Throughput Sampler). Data  
499 analysis was performed in FlowJo (v10.0). Our gating strategy for singlet selection, CFP  
500 background removal, and FRET+ signal (BV510 channel) was performed as previously  
501 described (Martinez et al., 2022). Tau-seeding activity was quantified as the percent of  
502 total cells with FRET+ signal.

## 503 **Western blotting**

504 A total of 15 µg of protein were loaded onto a 4 to 20% TGX gel (Bio-Rad), separated  
505 by gel electrophoresis, and transferred onto polyvinylidene difluoride membranes.  
506 Membranes were blocked with 5% Bovine Serum Albumin (BSA) in tris-buffered saline  
507 (TBS) containing 0.05% Tween20. Blots were probed with mouse anti-human TAU  
508 (HT7; 1:50,000; Invitrogen MN1000), chicken anti-GFP (1:1,000; Abcam ab 13970), and  
509 rabbit anti-GAPDH (1:10,000; Santa Cruz sc-25778) antibodies overnight at 4°C.  
510 Membranes were washed with TBS containing 0.05% Tween20 and incubated with anti-  
511 mouse, anti-rabbit, or anti-chicken HRP-linked IgG antibodies based on primary



512 antibody host (1:1,000). Membranes were developed via chemiluminescence [ECL  
513 Select (GE Healthcare)].

#### 514 **Tau Protein Quantification**

515 Quantification of total tau protein and phosphor-tauThr231 were measured using a kit  
516 from Meso Scale Diagnostics (K15121D). To read both total and phosphorylated tau  
517 simultaneously, normalized protein lysate from brain (2.0 mg/mL) was diluted 1:2,000.  
518 Signal detection was performed via MESO QuickPlex SQ 120MM and analysis was  
519 done using Methodical Mind software (Meso Scale Diagnostics, Rockville, Maryland).

#### 520 **Histology and immunohistochemistry**

521 Slides containing mounted coronal sections were deparaffinized using xylene. Antigen  
522 retrieval was performed with Low pH IHC Antigen Retrieval Solution (Invitrogen) in a  
523 pressure cooker set to 100°C for 10 minutes. For 3,3'-diaminobenzidine (DAB) staining,  
524 endogenous peroxidation was quenched by incubating slides in a solution containing  
525 10% methanol, 3% hydrogen peroxide in phosphate-buffered saline (PBS) for 10 minutes.  
526 Slides were blocked with 5% Normal Goat Serum (NGS) in PBS containing 0.25%  
527 Triton X-100. Sections were incubated with primary antibodies overnight at 4°C. Human  
528 tau-specific (HT7, 1:2,000; Invitrogen MN1000) and Tau<sup>pThr231/pSer235</sup>(AT180, 1:2,000 ,  
529 Invitrogen MN1040) antibodies were diluted in 2.5% NGS in PBS containing 0.4% Triton  
530 X-100. Sections were washed, briefly incubated in 1% BSA, and incubated with  
531 biotinylated goat anti-mouse secondary antibody (1:400, Thermo Fisher Scientific) at  
532 room temperature for 1 hour. Antibody detection for DAB development was done using  
533 the Vectastain ABC Elite (Vector Laboratories, PK6100) and DAB peroxidase substrate  
534 kits (Vector Laboratories, SK-4100). Sections were dehydrated and cleared with Ethanol  
535 and Xylene and immediately coverslipped with mounting medium containing 20%  
536 Xylene (Permount, Thermo Fisher Scientific). Representative images were obtained  
537 using brightfield microscopy at the magnifications noted in figure legends (4X, 20X).

#### 538 **RNA preparation for qPCR and mRNA-seq**

539 Total RNA was extracted from posterior cortex brain tissue using TRIzol (MRC). RNA  
540 concentration and quality were determined via Nanodrop 200 Spectrophotometer.

541 For real-time quantitative Polymerase Chain Reaction (qPCR), cDNA was prepared  
542 using a High Capacity cDNA Reverse Transcription kit (Applied Biosystems). qPCR was  
543 performed in QuantStudio 3 using the recommended protocol for FAST SYBR (Applied  
544 Biosystems) with the following primers: human specific *MAPT* forward  
545 TTGCTCAGGTCAACTGGTTT, human specific *MAPT* reverse  
546 ACTGAGAACCTGAAGCACCA, mouse *Gapdh* forward  
547 AAGGTGAAGGTCGGAGTCAAC, mouse *Gapdh* reverse  
548 GGGGTCATTGATGGCAACAATA. Relative mRNA levels were calculated by  
549 comparative cycle threshold ( $\Delta\Delta Ct$ ).

550 For mRNA-seq, total RNA was concentrated and purified using RNA Clean-Up &  
551 Concentrator-5 kit (Zymo Research). RNA Integrity Number (RIN) and concentration  
552 were determined via TapeStation RNA tape (Agilent). Sequencing was performed by  
553 the Center for Medical Genomics at the Indiana University School of Medicine  
554 (Indianapolis, IN). Libraries created from 100ng of total RNA using mRNA HyperPrep kit  
555 (KAPA). Libraries were then checked for quality and loaded at a concentration of 300  
556 pM on a flow cell for 100 bp paired-end sequencing (S4\_200cycle flow cell v1.5).  
557 Sequencing was then performed on an Illumina NovaSeq 6000 at an average  
558 sequencing depth of ~30 million reads per sample.

## 559 **Transcriptomic analyses**

560 Reads were mapped to the respective reference genome of each genetic background  
561 (B6-UCSC/refGene mm10, CAST-GCA\_001624445.1, PWK-GCA\_001624775.1, WSB-  
562 GCA\_001624835.1) using RNA-seq aligner STAR (v.2.7.10a). See Supplement  
563 information for sequencing and mapping statistics (Supp. File 2M-Q). Reads were  
564 assigned to genomic features using featureCounts (Liao et al., 2014). Raw read counts  
565 were analyzed for either differential expression analysis in DESeq2 (Love et al., 2014)  
566 (v1.36.0) or network analysis using Weighted Gene Co-expression Network Analysis  
567 (Langfelder and Horvath, 2008) (v1.71).

568 For differential expression analysis, two separate strategies were applied. To identify a  
569 core transcriptional response to expressing hTauP301L, analysis was first done on each  
570 genetic background separately. This allowed for strain-specific genes that are not  
571 annotated in the mm10 reference genome to be included in our initial analyses. Within  
572 each genetic background, genes with a raw read count of less than 10 were filtered out.  
573 Differential gene expression was then calculated for AAV-hTauP301L injected mice  
574 relative to AAV-eGFP control (B6 = 17,963, CAST = 22,426, PWK = 22,100, WSB =  
575 22,399 genes after filtering). Up- and down-regulated genes were defined using a  
576 significance cutoff of 0.05 (Benjamini Hochberg adjusted p-values) and a 1.5-fold  
577 change (after *apeglm* effect size shrinkage (Zhu et al., 2019)).

578 The second differential expression analysis aimed to find unique responses to  
579 hTauP301L without the effect of genetic background or tau expression alone. To do  
580 this, raw read counts across genetic backgrounds were merged keeping only genes that  
581 were annotated in the mouse reference genome (mm10). After merging, 19,468 genes  
582 were identified at least once in each genetic background and 17,240 had at least 10  
583 read counts across all genetic backgrounds. These 17,240 genes were used in all  
584 downstream analyses (PCA, unique transcriptional response, WGCNA). Note that there  
585 were several genes mapped to wild-derived backgrounds that were removed from the  
586 analysis because they correspond to more than one gene on the reference genome  
587 (CAST = 12, PWK = 12, WSB = 14 multi-mapped genes removed). These were all either  
588 predicted genes ("Gm" prefix) with the exception of one small nucleolar RNA (Snora43).

589 Raw reads underwent variance stabilization transformation (vst) and principle  
590 component analysis (PCA) was used to identify potential outliers. Differential gene  
591 expression was then performed with genetic background as an interaction  
592 (~Injection+GeneticBackground+Injection:GeneticBackground). The goal of this  
593 calculation is to identify tau-responsive genes that were dependent solely on genetic  
594 background. Up- and down-regulated genes were defined using a significance cutoff of  
595 0.05 (Benjamini Hochberg adjusted p-values) and a 1.5-fold change (after *apeglm* effect  
596 size shrinkage) for each interaction term (Tx\_Tau\_CAST, Tx\_Tau\_PWK, and  
597 Tx\_Tau\_WSB) with the B6 as a baseline.

598 We then performed WGCNA to identify modules of co-expressed genes that could  
599 explain the variation we reported in tau seeding activity across genetic backgrounds.  
600 For this analysis, we returned to the raw count matrices without any normalization or  
601 filtering as recommended by the authors of the pipeline  
602 ([https://horvath.genetics.ucla.edu/html/CoexpressionNetwork/Rpackages/WGCNA/faq.h](https://horvath.genetics.ucla.edu/html/CoexpressionNetwork/Rpackages/WGCNA/faq.html)  
603 [tml](https://horvath.genetics.ucla.edu/html/CoexpressionNetwork/Rpackages/WGCNA/faq.html)). After outlier removal in WGCNA, we were left with a total of 60 samples (Supp.  
604 Figure 3A). Our data did not reach the suggested scale free topology model fit cutoff of  
605 0.9 (Supp. Figure 3B). A soft power threshold of 6 was selected based on the  
606 suggestions by the authors of the pipeline for a dataset with more than 40 samples. A  
607 total of 60 modules were identified (Supp. Figure 3C) and 11 of them were significantly  
608 associated with FRET+ seeding activity (Supp. Figure 3D; Pearson's correlation,  $p <$   
609 0.05).

610 Enrichment analyses for core tau signature (Supp. File 3J), unique tau signature (Supp.  
611 File 3K), and WGCNA modules (Supp. File 3L) were performed in gProfiler2 (R Client,  
612 v0.2.1). Output includes enrichment for Gene Ontology (GO) terms, Reactome (REAC),  
613 TRANSFAC (TF), miRTarBase (MIRNA), Human Protein Atlas (HPA), Comprehensive  
614 Resource of Mammalian Protein Complexes (CORUM), Human Phenotype Ontology  
615 (HP), and WikiPathways (WP).

616 For enrichment of our signatures against other published datasets, we performed a  
617 Fisher's exact test using the stats package in R (v4.2.1). Given the size of test signature  
618 (A), the size of the signature from literature (B), the size of overlap between signature  
619 A/B (t), background (n = whole transcriptome), enrichment was considered significant if  
620  $p < 0.05$ . The command `stats::dhyper(t:B,A,n-A,B)` returned the p-value for Fisher's  
621 exact enrichment.

## 622 **Statistical analysis and Figure Creation**

623 For analysis of tau pathology, analysis was done via one-way Analysis of Variance  
624 (ANOVA) followed by Tukey Honest Significant Difference (HSD) post-hoc test.  
625 Statistical tests are reported in the figure legends with sample size, F statistic, degrees  
626 of freedom, and  $p$  value. Where appropriate, figures are labeled with the exact  $p$  value  
627 ( $p > 0.05$ ), \* ( $p < 0.05$ ), \*\* ( $p < 0.01$ ), \*\*\* ( $p < 0.001$ ). All analysis was done in R (v4.2.1)

628 and figures were created using ggplot2 (v3.3.6), Cytoscape (v3.9.1), and  
629 BioRender.com.

### 630 **Data availability**

631 Data files from mRNAseq analysis will be made publically available on Gene Expression  
632 Omnibus (GEO) upon publication. All remaining data can be found in the supplemental  
633 information in this manuscript or can be made available upon request.

### 634 **Supplemental data**

635 Supplemental figures include a summary of genetic background-specific transcriptomic  
636 analyses not shown in the main figures (Supp Figure 1), a description of a pilot study to  
637 determine sample size (Supp. Figure 2A-C), characterization of our AAV-injected tau  
638 module suggesting no effect of genetic background on the expression of human tau or  
639 tau seeding activity in the hippocampus (Supp. Figure 2D-J), and a summary of  
640 WGCNA analysis (Supp. Figure 3). Supplemental files contain wild-derived AMP-AD  
641 variant information (Supp. File 1) and summaries of transcriptomic analyses (Supp. File  
642 2).

643 **ACKNOWLEDGEMENTS**

644 This work was supported by National Institute of Health Grants R01 AG077829, R01  
645 AG071281, RF1 AG074543, R21 AG072738 (J.K.); NIH Predoctoral Fellowship  
646 provided through T32AG071444 (D.J.A.), F31AG074673 (M.D.T.), T32AG071444  
647 (H.R.S.W.), F30AG079580 (H.R.S.W.), F31AG074628 (T.J.M.), T32DK064466 (D.C.S.),  
648 Paul and Carole Stark Medical Neuroscience Fellowship (D.J.A.), Sarah Roush  
649 Memorial Fellowship (H.K.), and Eli Lilly-Stark Neuroscience Fellowship (S.P. and  
650 L.C.D.). The JK laboratory was also supported by the Strategic Research Initiative  
651 (Indiana University) and Indiana University Precision Health Initiative. We thank Dr.  
652 Leonard Petrucelli (Mayo Clinic) for providing AAV hTauP301L (RF1 AG062077). This  
653 work was also supported, in part, by the Indiana University Pervasive Technology  
654 Institute (supported in part by the Lily Endowment Inc.), Shared University Research  
655 grants from IBM inc., to Indiana University, the Histology Core of the Indiana Center for  
656 Musculoskeletal Health at IU School of Medicine, and the Bone and Body Composition  
657 Core of the Indiana Clinical Translational Sciences Institute (CTSI). Sequencing  
658 analysis was carried out in the Center for Medical Genomics at Indiana University  
659 School of Medicine, which is partially supported by the Indiana University Grand  
660 Challenges Precision Health Initiative. We would like to especially acknowledge Windy  
661 Woodford, Kari McClimon, and Zachary Bault from the Indiana University Laboratory  
662 Animal Resource Center for their assistance with the husbandry of wild-derived mice.  
663 The authors declare no competing financial interests. *Author contributions:* D.J.A. and  
664 J.K. designed the study and interpreted the results. D.J.A., M.D.T., B.M., A.D.S., S.J.,  
665 H.K., B.K. T.J.M, D.C.S., S.J.B., and B.T.L. performed the experiments. Y.Y. and C.L.R.  
666 performed the tau seeding assay. D.J.A., L.C.D, S.P., and H.R.S.W analyzed the  
667 transcriptomic data. D.J.A. and J.K. drafted the manuscript. All authors revised and  
668 approved the final manuscript.

669 **Abbreviations**

670 AAV: Adeno-Associated Virus

671 AD: Alzheimer's Disease

672 AMP-AD: Accelerating Medicines Partnership® Program for Alzheimer's Disease

673 B6: C57BL/6J

674 CAST: CAST/EiJ

675 DAM: Disease-Associated Microglia

676 eGFP: enhanced Green Fluorescent Protein

677 FRET: Fluorescence Resonance Energy Transfer

678 MAPT: Microtubule Associated Protein Tau

679 PWK: PWK/PhJ

680 RD: Repeat Domain

681 SNP: Single Nucleotide Polymorphism

682 WSB: WSB/EiJ

683 **FIGURES**

684

685 **Figure 1. Variants in Wild-derived Genetic Backgrounds within AMP-AD**  
686 **Nominated Target Genes.** Classical inbred mouse model C57BL/6J and three wild-  
687 derived mouse genetic backgrounds (CAST/EiJ, PWK/PhJ, and WSB/EiJ). Variants in  
688 wild-derived mice were called using the Mouse Universal Genotyping Array  
689 (gigaMUGA) relative to the reference genome (C57BL/6J) and recoded (0:reference  
690 call, 1:heterozygous variant, 2:homozygous variant). Wild-derived mice contain 5,810  
691 variants in the 537 “Nominated Target Genes” from the Accelerating Medicines  
692 Partnership Program for Alzheimer’s Disease (AMP-AD) consortium (Accessed March  
693 1, 2021).

694

695 **Figure 2. Signature A: Core Tau-responsive Signature Across Genetic**  
696 **Backgrounds.** (A) Experimental design to express Tau in B6 and 3 wild-derived mouse  
697 strains. In short, AAV-eGFP or AAV-hTauP301L was injected into mice of each genetic  
698 background. At 6-months old, brain tissue was collected and analyzed via mRNA-  
699 sequencing. Reads were aligned to each strain’s respective genomes. Differential gene  
700 expression revealed up-regulated ( $FC > 1.5$ ,  $p_{adj} < 0.05$ ) and down-regulated ( $FC < -$   
701  $1.5$ ,  $p_{adj} < 0.05$ ) in hTauP301L-injected mice compared to GFP-injected controls ( $n =$   
702  $32$ /AAV injection group). (B) Principal component analysis shows the genetic  
703 background drives variation in the transcriptome ( $n = 8$ /background/AAV injection  
704 group). (C) Upset plot to summarize multiple differential expression analyses:  
705 Differential expression (hTauP301L vs eGFP) was performed for each strain (see  
706 Supplemental Figure 1, Supplemental File 2A-D). Signature A (highlighted in yellow)  
707 was identified as the intersection of differentially expressed genes (DEGs) shared  
708 across genetic backgrounds. These 2,467 DEGs were shared across all 4 genetic  
709 backgrounds. Other intersections are provided as a resource (Supplemental File 2E).  
710 (D) KEGG enrichment of Signature A is significantly enriched for neurodegeneration-  
711 related terms and map05022 “Pathways of neurodegeneration” (yellow, DEG  
712 intersection: 168/471 genes). See the supplemental information for a summary of all  
713 enrichment analyses (Supp. File 2J). (E) Heatmap of the top 10 DEGs in “Pathways of  
714 neurodegeneration – multiple diseases” (map05022) shows the conserved response to  
715 AAV-hTauP301L injection in Signature A.

716

717 **Figure 3. Signature B: Unique Tau-responsive Signatures in Wild-Derived Genetic**  
718 **Backgrounds.** Differentially expressed genes (DEGs) specific to wild-derived  
719 background ( $\sim$ Injection+GeneticBackground+Injection:GeneticBackground; Benjamini  
720 Hochberg adjusted p-value  $< 0.05$ ,  $FC > 1.5$ ) were calculated for hTauP301L-injected  
721 mice relative to eGFP-injected controls. (A) 133 in total DEGs were identified in one or  
722 more wild-derived backgrounds. (B) 17/133 DEGs in Signature B were shared by all  
723 three wild-derived backgrounds. (C) Cilia and flagella associated protein 74 (*Cfap74*)  
724 and 16 other wild-derived DEGs are not differentially expressed in B6 mice. There are  
725 53 CAST-specific DEGs, 22 PWK-specific DEGs, and 25 WSB-specific DEGs are only

726 differentially expressed in one wild-derived background. The (D) top 5 down-regulated  
727 and (E) top 5 up-regulated in each background are shown in a heatmap colored by  
728 log<sub>2</sub>FoldChange between hTauP301L-injected and eGFP-injected mice. See  
729 supplemental files for all background-specific DEGs (Supp. File 2F-H).

730 **Figure 4. Tau Seeding Activity is Modulated by Genetic Background Independent**  
731 **of Tau Expression Level.** (A) Paradigm of Tau biosensor cells to measure seeding  
732 activity assay. HEK-293T cells containing CFP- or YFP-conjugated tau are transfected  
733 with brain lysate from hTauP301L-injected mice for 24 hours. Biosensor cells are then  
734 collected and FRET+ signal is measured via Fluorescence-Activated Cell Sorting  
735 (FACS) as a proxy for tau seeding activity. (B) Human tau expression was measured  
736 using quantitative PCR. Relative hMAPT expression was calculated relative to GAPDH  
737 and showed no effect of genetic background ( $n = 69$ ,  $F_{3,66} = 0.234$ ,  $p = 0.87$ ). (C) Tau  
738 seeding activity was measured as the % of HEK-293T biosensor cells in the final  
739 FRET+ (YFP) gate using FACS. Tau seeding activity was significantly affected by  
740 genetic backgrounds ( $n = 81$ ,  $F_{3,78} = 9.237$ ,  $p = 2.67 \times 10^{-5}$ ). Tukey HSD post-hoc test  
741 revealed elevated tau seeding activity in CAST and PWK relative to B6 (\*\*\*:  $p < 0.001$ ).

742 **Figure 5. Signature C: Tau Seeding-Associated Signature in PWK and CAST**  
743 **strains.** Gene module detection was performed using Weighted Gene Co-expression  
744 Network Analysis (WGCNA) from hTauP301L-injected and eGFP-injected mice.  
745 Module-trait detection revealed the top two tau seeding-associated modules (A) cyan  
746 and (B) darkorange. Discovery of associated modules were prioritized based on  
747 association with injection type (Injection, 1<sup>st</sup> column), genetic background (Wild-derived,  
748 2<sup>nd</sup> column), sex (Sex, 3<sup>rd</sup> column), and tau seeding activity (FRET, 4<sup>th</sup> column).  
749 Statistics for module-trait association include Pearson's R and Benjamini-Hochberg  
750 adjusted p value. A full list of all 60 modules and their module-trait correlation can be  
751 found in Supplemental Figure 3.(C) Darkorange module was renamed "Signature C":  
752 Gene network represented as nodes with edge distance representing topological  
753 overlap matrix (TOM) score from WGCNA. Neurodegenerative hub-genes (purple) were  
754 detected by comparing Signature C (darkorange) and wild-derived amyloid response  
755 (Fisher's exact test:  $p = 1.62 \times 10^{-19}$ ; Onos et al., 2019). (D) KEGG enrichment and (E)  
756 WikiPathways enrichment of Signature C reveal microglia-related terms. See  
757 supplemental information for WGCNA parameters ( $n = 60$  samples after outlier  
758 detection).

759 **Figure 6. Resource: Guideline to Select a Mouse Genetic Background to Study**  
760 **Tau.** (A) Signatures A-C of this study represent a core response to expressing AAV-  
761 hTauP301L (Signature A), wild-derived specific response to AAV-hTauP301L  
762 expression (Signature B), and a tau seeding-associated module (Signature C). (B)  
763 Given a gene of interest, the resources in this paper can guide genetic background  
764 selection for functional studies in mice. For example, *Trem2*, a gene with strong  
765 evidence for a role in tau pathology, is present in Signature A (Core Tau-response) and  
766 Signature C (Tau seed-response). Based on this evidence, while *Trem2* is differentially



767 expressed in response to tau across all mouse strains, there is a possibility that it is  
768 involved in a CAST- or PWK-specific reaction to tau seeds.

## 769 **Supplemental Figures**

770 **Supplemental Figure 1 Transcriptomic Analyses for Discovery of Core Tau**  
771 **Response (Signature A).** Volcano plot demonstrates the log<sub>2</sub> fold change (x-axis) and  
772 statistical significance (Benjamini-Hochberg adjust p-value, y-axis). (A) B6, (B) CAST,  
773 (C) PWK, and (D) WSB mice were analyzed separately to compare genes up-regulated  
774 (red, FC > 1.5, p<sub>adj</sub> < 0.05) and down-regulated (blue, FC < 1.5, p<sub>adj</sub> < 0.05) in Tau-  
775 injected mice compared to GFP-injected controls (n = 32/injection group). (E) KEGG  
776 Enrichment of Signature A defined in Figure 2C. (F) Heatmap of all Signature A genes  
777 in KEGG map05022.

778 **Supplemental Figure 2. Tau Pathology in hTauP301 expressing wild-derived mice.**  
779 (A) Design of a pilot study to determine the sample size. One litter of B6 and WSB mice  
780 were injected with AAV-hTauP301L and aged 6 weeks. TBS-soluble protein lysate from  
781 the cortex of each pup was transfected into Tau biosensor cells. 24 hours after  
782 transfection, cells were trypsinized and FRET+ signal was measured via FACS as a  
783 proxy for tau seeding activity. (B) Our pilot study suggests genetic background affects  
784 tau seeding activity (n<sub>B6</sub> = 6, n<sub>WSB</sub> = 5; Welch's t-test p = 0.0172). (C) Power analysis  
785 based on the seeding activity pilot study suggests a sample size of at least 8 to properly  
786 power the main study. (D) Design of the main study to investigate the role of wild-  
787 derived mouse genetic background on tauopathy. (E) Representative images show  
788 widespread expression of human Tau (HT7+ stain) in injected mice compared to sham-  
789 injected control. Images taken at 4X magnification. (F) Representative images suggest  
790 the presence of tau aggregates (AT180+ stain) in the cortex of B6 and wild-derived mice  
791 injected with AAV-hTauP301L. Images at 20X magnification were taken of the cortex  
792 directly superior to the hippocampus at approximately Bregman -1.46mm. (G)  
793 Representative Western blot show human Tau (HT7+ blot) in the cortex and  
794 hippocampus of AAV-hTauP301L injected mice compared to AAV-eGFP injected  
795 controls. (H) Tau protein quantification of total Tau (tTau) and pTau231 (normalized to  
796 tTau) show no effect of genetic background. (I) Tau seeding activity of protein extracted  
797 from the hippocampus shows no effect of genetic background. (J) Technical replication  
798 of tau seeding activity (n = 2 technical replicates per mouse) shows a high correlation in  
799 the cortex (R<sup>2</sup> = 0.7988) and hippocampus (R<sup>2</sup> = 0.8701).

800 **Supplemental Figure 3. Summary of Weighted Gene Co-expression Network**  
801 **Analysis (WGCNA).** Gene module detection was performed using Weighted Gene Co-  
802 expression Network Analysis (WGCNA) from hTauP301L-injected and eGFP-injected  
803 mice. (A) Sample dendrogram and trait heatmap reveal outlier detection by calculating  
804 unbiased sample similarity. Trait heatmap shows samples are segregated out mainly by  
805 Injection type and seeding activity score (FRET). (B) Scale independence and mean  
806 connectivity calculated by the WGCNA package. Although no thresholds reached the  
807 recommended 0.9 threshold for scale free topology, a threshold of 6 was selected

808 based on recommendations of the package's authors for unsigned network detection in  
809 an experiment with at least 40 samples. (C) Module discovery was performed by  
810 clustering genes based on topological overlap matrix (TOM) dissimilarity (y-axis:  
811 height). Similar clusters were merged using a dissimilarity threshold of 0.25 (merged  
812 dynamic). 60 remaining clusters were assigned arbitrary names using R's color palette.  
813 (D) To prioritize modules of interest, quantified traits were correlated to each module's  
814 eigengene expression. Pearson's R and Benjamini-Hochberg adjusted p-value were  
815 reported in each cell of the heatmap (colored by Pearson's R). Injection defined as  
816 binary trait (1: tau, 0: GFP). Genetic background defined as a binary trait (1: wild-  
817 derived, 0:B6). Sex defined as a binary trait (1: female, 0: male). FRET defined as a  
818 measurement of %Cells with FRET+ signal from Figure 4C).

819 **Supplemental File 1. Genotyped Variants of Wild-Derived Mice in AMP-AD**  
820 **Nominated Genes.** (A) List of AMP-AD Nominated Targets. Downloaded from Agora  
821 2021/03/05. (B) Summary of genotyped markers in AMP-AD nominated targets. (C)  
822 Genotyped variants of wild-derived mice in AMP-AD nominated targets.

823 **Supplemental File 2 Summary of Genetic Background-Specific Transcriptomic**  
824 **Analyses.** (A) Differential expression analysis of B6.Tau relative to B6.eGFP injected  
825 mice (whole B6-transcriptome analysis = 17,963 genes). (B) Differential expression  
826 analysis of CAST.Tau relative to CAST.eGFP injected mice (whole CAST-transcriptome  
827 analysis = 22,426 genes). (C) Differential expression analysis of PWK.Tau relative to  
828 PWK.eGFP injected mice (whole PWK-transcriptome analysis = 22,100 genes). (D)  
829 Differential expression analysis of WSB.Tau relative to WSB.eGFP injected mice (whole  
830 WSB-transcriptome analysis = 22,399 genes). (E) Upset plot intersection list. Only  
831 genes that were measured in each genetic background were kept in this analysis (n =  
832 15,311). Instructions on how to search for specific intersections are found in file. (F)  
833 Differential expression analysis with CAST as an interaction term (Tx\_Tau\_CAST)  
834 reveal a unique tau-response not found in B6 mice. (G) Differential expression analysis  
835 with PWK as an interaction term (Tx\_Tau\_PWK) reveal a unique tau-response not  
836 found in B6 mice. (H) Differential expression analysis with WSB as an interaction term  
837 (Tx\_Tau\_WSB) reveal a unique tau-response not found in B6 mice. (I) Summary of  
838 WGCNA by gene name. This includes the module to which each gene was assigned,  
839 the gene significance and p-value for an association to FRET value, gene module  
840 membership value, and MMP value. Enrichment analysis output from gprofiler2 for (J)  
841 Signature A: core tau-response (K) Signature B: unique tau-response and (L) Signature  
842 C: tau-seeding associated response. (M) Sequencing and (N-Q) mapping statistics are  
843 summarized for each sample.

844

845 **REFERENCES**

- 846 ARRIAGADA, P. V., GROWDON, J. H., HEDLEY-WHYTE, E. T. & HYMAN, B. T. 1992. Neurofibrillary tangles  
847 but not senile plaques parallel duration and severity of Alzheimer's disease. *Neurology*, 42, 631-  
848 9.
- 849 BAILEY, R. M., HOWARD, J., KNIGHT, J., SAHARA, N., DICKSON, D. W. & LEWIS, J. 2014. Effects of the  
850 C57BL/6 strain background on tauopathy progression in the rTg4510 mouse model. *Mol*  
851 *Neurodegener*, 9, 8.
- 852 BENGOA-VERGNIORY, N., VELENTZA-ALMPANI, E., SILVA, A. M., SCOTT, C., VARGAS-CABALLERO, M.,  
853 SASTRE, M., WADE-MARTINS, R. & ALEGRE-ABARRATEGUI, J. 2021. Tau-proximity ligation assay  
854 reveals extensive previously undetected pathology prior to neurofibrillary tangles in preclinical  
855 Alzheimer's disease. *Acta Neuropathol Commun*, 9, 18.
- 856 BLAKE, J. A., BALDARELLI, R., KADIN, J. A., RICHARDSON, J. E., SMITH, C. L., BULT, C. J. & MOUSE  
857 GENOME DATABASE, G. 2021. Mouse Genome Database (MGD): Knowledgebase for mouse-  
858 human comparative biology. *Nucleic Acids Res*, 49, D981-D987.
- 859 CARLOMAGNO, Y., CHUNG, D. C., YUE, M., KURTI, A., AVENDANO, N. M., CASTANEDES-CASEY, M.,  
860 HINKLE, K. M., JANSEN-WEST, K., DAUGHRITY, L. M., TONG, J., PHILLIPS, V., RADEMAKERS, R.,  
861 DETURE, M., FRYER, J. D., DICKSON, D. W., PETRUCELLI, L. & COOK, C. 2019. Enhanced  
862 phosphorylation of T153 in soluble tau is a defining biochemical feature of the A152T tau risk  
863 variant. *Acta Neuropathol Commun*, 7, 10.
- 864 CASTANHO, I., MURRAY, T. K., HANNON, E., JEFFRIES, A., WALKER, E., LAING, E., BAULF, H., HARVEY, J.,  
865 BRADSHAW, L., RANDALL, A., MOORE, K., O'NEILL, P., LUNNON, K., COLLIER, D. A., AHMED, Z.,  
866 O'NEILL, M. J. & MILL, J. 2020. Transcriptional Signatures of Tau and Amyloid Neuropathology.  
867 *Cell Rep*, 30, 2040-2054 e5.
- 868 CHURCHILL, G. A., AIREY, D. C., ALLAYEE, H., ANGEL, J. M., ATTIE, A. D., BEATTY, J., BEAVIS, W. D.,  
869 BELKNAP, J. K., BENNETT, B., BERRETTINI, W., BLEICH, A., BOGUE, M., BROMAN, K. W., BUCK, K.  
870 J., BUCKLER, E., BURMEISTER, M., CHESLER, E. J., CHEVERUD, J. M., CLAPCOTE, S., COOK, M. N.,  
871 COX, R. D., CRABBE, J. C., CRUSIO, W. E., DARVASI, A., DESCHEPPER, C. F., DOERGE, R. W.,  
872 FARBER, C. R., FOREJT, J., GAILE, D., GARLOW, S. J., GEIGER, H., GERSHENFELD, H., GORDON, T.,  
873 GU, J., GU, W., DE HAAN, G., HAYES, N. L., HELLER, C., HIMMELBAUER, H., HITZEMANN, R.,  
874 HUNTER, K., HSU, H. C., IRAQI, F. A., IVANDIC, B., JACOB, H. J., JANSEN, R. C., JEPSEN, K. J.,  
875 JOHNSON, D. K., JOHNSON, T. E., KEMPERMANN, G., KENDZIORSKI, C., KOTB, M., KOOY, R. F.,  
876 LLAMAS, B., LAMMERT, F., LASSALLE, J. M., LOWENSTEIN, P. R., LU, L., LUSIS, A., MANLY, K. F.,  
877 MARCUCIO, R., MATTHEWS, D., MEDRANO, J. F., MILLER, D. R., MITTLEMAN, G., MOCK, B. A.,  
878 MOGIL, J. S., MONTAGUTELLI, X., MORAHAN, G., MORRIS, D. G., MOTT, R., NADEAU, J. H.,  
879 NAGASE, H., NOWAKOWSKI, R. S., O'HARA, B. F., OSADCHUK, A. V., PAGE, G. P., PAIGEN, B.,  
880 PAIGEN, K., PALMER, A. A., PAN, H. J., PELTONEN-PALOTIE, L., PEIRCE, J., POMP, D., PRAVENEK,  
881 M., PROWS, D. R., QI, Z., REEVES, R. H., RODER, J., ROSEN, G. D., SCHADT, E. E., SCHALKWYK, L.  
882 C., SELTZER, Z., SHIMOMURA, K., SHOU, S., SILLANPAA, M. J., SIRACUSA, L. D., SNOECK, H. W.,  
883 SPEAROW, J. L., SVENSON, K., et al. 2004. The Collaborative Cross, a community resource for the  
884 genetic analysis of complex traits. *Nat Genet*, 36, 1133-7.
- 885 CHURCHILL, G. A., GATTI, D. M., MUNGER, S. C. & SVENSON, K. L. 2012. The Diversity Outbred mouse  
886 population. *Mamm Genome*, 23, 713-8.
- 887 CLAVAGUERA, F., BOLMONT, T., CROWTHER, R. A., ABRAMOWSKI, D., FRANK, S., PROBST, A., FRASER,  
888 G., STALDER, A. K., BEIBEL, M., STAUFENBIEL, M., JUCKER, M., GOEDERT, M. & TOLNAY, M. 2009.  
889 Transmission and spreading of tauopathy in transgenic mouse brain. *Nat Cell Biol*, 11, 909-13.
- 890 CONGDON, E. E. & SIGURDSSON, E. M. 2018. Tau-targeting therapies for Alzheimer disease. *Nat Rev*  
891 *Neurol*, 14, 399-415.

- 892 COOK, C., DUNMORE, J. H., MURRAY, M. E., SCHEFFEL, K., SHUKOOR, N., TONG, J., CASTANEDES-CASEY,  
893 M., PHILLIPS, V., ROUSSEAU, L., PENULIAR, M. S., KURTI, A., DICKSON, D. W., PETRUCCELLI, L. &  
894 FRYER, J. D. 2014. Severe amygdala dysfunction in a MAPT transgenic mouse model of  
895 frontotemporal dementia. *Neurobiol Aging*, 35, 1769-77.
- 896 COOK, C., KANG, S. S., CARLOMAGNO, Y., LIN, W. L., YUE, M., KURTI, A., SHINOHARA, M., JANSEN-WEST,  
897 K., PERKERSON, E., CASTANEDES-CASEY, M., ROUSSEAU, L., PHILLIPS, V., BU, G., DICKSON, D. W.,  
898 PETRUCCELLI, L. & FRYER, J. D. 2015. Tau deposition drives neuropathological, inflammatory and  
899 behavioral abnormalities independently of neuronal loss in a novel mouse model. *Hum Mol*  
900 *Genet*, 24, 6198-212.
- 901 DE CALIGNON, A., POLYDORO, M., SUAREZ-CALVET, M., WILLIAM, C., ADAMOWICZ, D. H., KOPEIKINA, K.  
902 J., PITSTICK, R., SAHARA, N., ASHE, K. H., CARLSON, G. A., SPIRES-JONES, T. L. & HYMAN, B. T.  
903 2012. Propagation of tau pathology in a model of early Alzheimer's disease. *Neuron*, 73, 685-97.
- 904 DEVOS, S. L., CORJUC, B. T., OAKLEY, D. H., NOBUHARA, C. K., BANNON, R. N., CHASE, A., COMMINS, C.,  
905 GONZALEZ, J. A., DOOLEY, P. M., FROSCH, M. P. & HYMAN, B. T. 2018. Synaptic Tau Seeding  
906 Precedes Tau Pathology in Human Alzheimer's Disease Brain. *Front Neurosci*, 12, 267.
- 907 DUJARDIN, S., FERNANDES, A., BANNON, R., COMMINS, C., DE LOS SANTOS, M., KAMATH, T. V.,  
908 HAYASHI, M. & HYMAN, B. T. 2022. Tau propagation is dependent on the genetic background of  
909 mouse strains. *Brain Commun*, 4, fcac048.
- 910 EFTHYMIIOU, A. G. & GOATE, A. M. 2017. Late onset Alzheimer's disease genetics implicates microglial  
911 pathways in disease risk. *Mol Neurodegener*, 12, 43.
- 912 ESKANDARI-SEDIGHI, G., DAUDE, N., GAPESHINA, H., SANDERS, D. W., KAMALI-JAMIL, R., YANG, J., SHI,  
913 B., WILLE, H., GHETTI, B., DIAMOND, M. I., JANUS, C. & WESTAWAY, D. 2017. The CNS in inbred  
914 transgenic models of 4-repeat Tauopathy develops consistent tau seeding capacity yet focal and  
915 diverse patterns of protein deposition. *Mol Neurodegener*, 12, 72.
- 916 EZERSKIY, L. A., SCHOCH, K. M., SATO, C., BELTCHEVA, M., HORIE, K., RIGO, F., MARTYNOWICZ, R.,  
917 KARCH, C. M., BATEMAN, R. J. & MILLER, T. M. 2022. Astrocytic 4R tau expression drives  
918 astrocyte reactivity and dysfunction. *JCI Insight*, 7.
- 919 FROST, B., JACKS, R. L. & DIAMOND, M. I. 2009. Propagation of tau misfolding from the outside to the  
920 inside of a cell. *J Biol Chem*, 284, 12845-52.
- 921 GAN, K. J., AKRAM, A., BLASIUS, T. L., RAMSER, E. M., BUDAITIS, B. G., GABRYCH, D. R., VERHEY, K. J. &  
922 SILVERMAN, M. A. 2020. GSK3beta Impairs KIF1A Transport in a Cellular Model of Alzheimer's  
923 Disease but Does Not Regulate Motor Motility at S402. *eNeuro*, 7.
- 924 HE, T., ITANO, M. S., EARLEY, L. F., HALL, N. E., RIDDICK, N., SAMULSKI, R. J. & LI, C. 2019. The Influence  
925 of Murine Genetic Background in Adeno-Associated Virus Transduction of the Mouse Brain. *Hum*  
926 *Gene Ther Clin Dev*, 30, 169-181.
- 927 HOLMES, B. B., FURMAN, J. L., MAHAN, T. E., YAMASAKI, T. R., MIRBAHA, H., EADES, W. C.,  
928 BELAYGOROD, L., CAIRNS, N. J., HOLTZMAN, D. M. & DIAMOND, M. I. 2014. Proteopathic tau  
929 seeding predicts tauopathy in vivo. *Proc Natl Acad Sci U S A*, 111, E4376-85.
- 930 HUTTON, M., LENDON, C. L., RIZZU, P., BAKER, M., FROELICH, S., HOULDEN, H., PICKERING-BROWN, S.,  
931 CHAKRAVERTY, S., ISAACS, A., GROVER, A., HACKETT, J., ADAMSON, J., LINCOLN, S., DICKSON, D.,  
932 DAVIES, P., PETERSEN, R. C., STEVENS, M., DE GRAAFF, E., WAUTERS, E., VAN BAREN, J.,  
933 HILLEBRAND, M., JOOSSE, M., KWON, J. M., NOWOTNY, P., CHE, L. K., NORTON, J., MORRIS, J. C.,  
934 REED, L. A., TROJANOWSKI, J., BASUN, H., LANNFELT, L., NEYSTAT, M., FAHN, S., DARK, F.,  
935 TANNENBERG, T., DODD, P. R., HAYWARD, N., KWOK, J. B., SCHOFIELD, P. R., ANDREADIS, A.,  
936 SNOWDEN, J., CRAUFURD, D., NEARY, D., OWEN, F., OOSTRA, B. A., HARDY, J., GOATE, A., VAN  
937 SWIETEN, J., MANN, D., LYNCH, T. & HEUTINK, P. 1998. Association of missense and 5'-splice-site  
938 mutations in tau with the inherited dementia FTDP-17. *Nature*, 393, 702-5.

- 939 JIN, N., GU, J., WU, R., CHU, D., TUNG, Y. C., WEGIEL, J., WISNIEWSKI, T., GONG, C. X., IQBAL, K. & LIU, F.  
940 2022. Tau seeding activity in various regions of down syndrome brain assessed by two novel  
941 assays. *Acta Neuropathol Commun*, 10, 132.
- 942 KANG, S. S., EBBERT, M. T. W., BAKER, K. E., COOK, C., WANG, X., SENS, J. P., KOCHER, J. P., PETRUCCELLI,  
943 L. & FRYER, J. D. 2018. Microglial translational profiling reveals a convergent APOE pathway from  
944 aging, amyloid, and tau. *J Exp Med*, 215, 2235-2245.
- 945 KARAHAN, H., SMITH, D. C., KIM, B., DABIN, L. C., AL-AMIN, M. M., WIJERATNE, H. R. S., PENNINGTON,  
946 T., VIANA DI PRISCO, G., MCCORD, B., LIN, P. B., LI, Y., PENG, J., OBLAK, A. L., CHU, S., ATWOOD,  
947 B. K. & KIM, J. 2021. Deletion of Abi3 gene locus exacerbates neuropathological features of  
948 Alzheimer's disease in a mouse model of Abeta amyloidosis. *Sci Adv*, 7, eabe3954.
- 949 KARCH, C. M. & GOATE, A. M. 2015. Alzheimer's disease risk genes and mechanisms of disease  
950 pathogenesis. *Biol Psychiatry*, 77, 43-51.
- 951 KAUFMAN, S. K., DEL TREDICI, K., THOMAS, T. L., BRAAK, H. & DIAMOND, M. I. 2018. Tau seeding activity  
952 begins in the transentorhinal/entorhinal regions and anticipates phospho-tau pathology in  
953 Alzheimer's disease and PART. *Acta Neuropathol*, 136, 57-67.
- 954 KEREN-SHAUL, H., SPINRAD, A., WEINER, A., MATCOVITCH-NATAN, O., DVIR-SZTERNFELD, R., ULLAND, T.  
955 K., DAVID, E., BARUCH, K., LARA-ASTAISO, D., TOTH, B., ITZKOVITZ, S., COLONNA, M.,  
956 SCHWARTZ, M. & AMIT, I. 2017. A Unique Microglia Type Associated with Restricting  
957 Development of Alzheimer's Disease. *Cell*, 169, 1276-1290 e17.
- 958 KIM, J., MILLER, V. M., LEVITES, Y., WEST, K. J., ZWIZINSKI, C. W., MOORE, B. D., TROENDLE, F. J., BANN,  
959 M., VERBEECK, C., PRICE, R. W., SMITHSON, L., SONODA, L., WAGG, K., RANGACHARI, V., ZOU, F.,  
960 YOUNKIN, S. G., GRAFF-RADFORD, N., DICKSON, D., ROSENBERRY, T. & GOLDE, T. E. 2008. BRI2  
961 (ITM2b) inhibits Abeta deposition in vivo. *J Neurosci*, 28, 6030-6.
- 962 KIM, J. Y., GRUNKE, S. D., LEVITES, Y., GOLDE, T. E. & JANKOWSKY, J. L. 2014. Intracerebroventricular  
963 viral injection of the neonatal mouse brain for persistent and widespread neuronal transduction.  
964 *J Vis Exp*, 51863.
- 965 KOLLMUS, H., FUCHS, H., LENGGER, C., HASELIMASHHADI, H., BOGUE, M. A., OSTEREICHER, M. A.,  
966 HORSCH, M., ADLER, T., AGUILAR-PIMENTEL, J. A., AMARIE, O. V., BECKER, L., BECKERS, J.,  
967 CALZADA-WACK, J., GARRETT, L., HANS, W., HOLTER, S. M., KLEIN-RODEWALD, T., MAIER, H.,  
968 MAYER-KUCKUK, P., MILLER, G., MORETH, K., NEFF, F., RATHKOLB, B., RACZ, I., ROZMAN, J.,  
969 SPIELMANN, N., TREISE, I., BUSCH, D., GRAW, J., KLOPSTOCK, T., WOLF, E., WURST, W.,  
970 YILDIRIM, A. O., MASON, J., TORRES, A., MOUSE PHENOME DATABASE, T., BALLING, R.,  
971 MEHAAN, T., GAILUS-DURNER, V., SCHUGHART, K. & HRABE DE ANGELIS, M. 2020. A  
972 comprehensive and comparative phenotypic analysis of the collaborative founder strains  
973 identifies new and known phenotypes. *Mamm Genome*, 31, 30-48.
- 974 KRAUS, A., SAIJO, E., METRICK, M. A., 2ND, NEWELL, K., SIGURDSON, C. J., ZANUSSO, G., GHETTI, B. &  
975 CAUGHEY, B. 2019. Seeding selectivity and ultrasensitive detection of tau aggregate conformers  
976 of Alzheimer disease. *Acta Neuropathol*, 137, 585-598.
- 977 LANGFELDER, P. & HORVATH, S. 2008. WGCNA: an R package for weighted correlation network analysis.  
978 *BMC Bioinformatics*, 9, 559.
- 979 LASAGNA-REEVES, C. A., DE HARO, M., HAO, S., PARK, J., ROUSSEAU, M. W., AL-RAMAHI, I., JAFAR-  
980 NEJAD, P., VILANOVA-VELEZ, L., SEE, L., DE MAIO, A., NITSCHKE, L., WU, Z., TRONCOSO, J. C.,  
981 WESTBROOK, T. F., TANG, J., BOTAS, J. & ZOGHBI, H. Y. 2016. Reduction of Nuak1 Decreases Tau  
982 and Reverses Phenotypes in a Tauopathy Mouse Model. *Neuron*, 92, 407-418.
- 983 LEE, V. M., BRUNDEN, K. R., HUTTON, M. & TROJANOWSKI, J. Q. 2011. Developing therapeutic  
984 approaches to tau, selected kinases, and related neuronal protein targets. *Cold Spring Harb*  
985 *Perspect Med*, 1, a006437.

- 986 LIAO, Y., SMYTH, G. K. & SHI, W. 2014. featureCounts: an efficient general purpose program for assigning  
987 sequence reads to genomic features. *Bioinformatics*, 30, 923-30.
- 988 LILUE, J., DORAN, A. G., FIDDES, I. T., ABRUDAN, M., ARMSTRONG, J., BENNETT, R., CHOW, W., COLLINS,  
989 J., COLLINS, S., CZECHANSKI, A., DANECEK, P., DIEKHANS, M., DOLLE, D. D., DUNN, M., DURBIN,  
990 R., EARL, D., FERGUSON-SMITH, A., FLICEK, P., FLINT, J., FRANKISH, A., FU, B., GERSTEIN, M.,  
991 GILBERT, J., GOODSTADT, L., HARROW, J., HOWE, K., IBARRA-SORIA, X., KOLMOGOROV, M.,  
992 LELLIOTT, C. J., LOGAN, D. W., LOVELAND, J., MATHEWS, C. E., MOTT, R., MUIR, P.,  
993 NACHTWEIDE, S., NAVARRO, F. C. P., ODOM, D. T., PARK, N., PELAN, S., PHAM, S. K., QUAIL, M.,  
994 REINHOLDT, L., ROMOTH, L., SHIRLEY, L., SISU, C., SJOBERG-HERRERA, M., STANKE, M.,  
995 STEWARD, C., THOMAS, M., THREADGOLD, G., THYBERT, D., TORRANCE, J., WONG, K., WOOD, J.,  
996 YALCIN, B., YANG, F., ADAMS, D. J., PATEN, B. & KEANE, T. M. 2018. Sixteen diverse laboratory  
997 mouse reference genomes define strain-specific haplotypes and novel functional loci. *Nat*  
998 *Genet*, 50, 1574-1583.
- 999 LONG, J. M. & HOLTZMAN, D. M. 2019. Alzheimer Disease: An Update on Pathobiology and Treatment  
1000 Strategies. *Cell*, 179, 312-339.
- 1001 LOVE, M. I., HUBER, W. & ANDERS, S. 2014. Moderated estimation of fold change and dispersion for  
1002 RNA-seq data with DESeq2. *Genome Biol*, 15, 550.
- 1003 MAKINO, S., KUNIMOTO, K., MURAOKA, Y., MIZUSHIMA, Y., KATAGIRI, K. & TOCHINO, Y. 1980. Breeding  
1004 of a non-obese, diabetic strain of mice. *Jikken Dobutsu*, 29, 1-13.
- 1005 MARTINEZ, P., PATEL, H., YOU, Y., JURY, N., PERKINS, A., LEE-GOSSELIN, A., TAYLOR, X., YOU, Y., VIANA DI  
1006 PRISCO, G., HUANG, X., DUTTA, S., WIJERATNE, A. B., REDDING-OCHOA, J., SHAHID, S. S.,  
1007 CODOCEDO, J. F., MIN, S., LANDRETH, G. E., MOSLEY, A. L., WU, Y. C., MCKINZIE, D. L., ROCHET, J.  
1008 C., ZHANG, J., ATWOOD, B. K., TRONCOSO, J. & LASAGNA-REEVES, C. A. 2022. Bassoon  
1009 contributes to tau-seed propagation and neurotoxicity. *Nat Neurosci*, 25, 1597-1607.
- 1010 MEKADA, K., ABE, K., MURAKAMI, A., NAKAMURA, S., NAKATA, H., MORIWAKI, K., OBATA, Y. & YOSHIKI,  
1011 A. 2009. Genetic differences among C57BL/6 substrains. *Exp Anim*, 58, 141-9.
- 1012 MHATRE, S. D., TSAI, C. A., RUBIN, A. J., JAMES, M. L. & ANDREASSON, K. I. 2015. Microglial malfunction:  
1013 the third rail in the development of Alzheimer's disease. *Trends Neurosci*, 38, 621-636.
- 1014 MIRBAHA, H., CHEN, D., MULLAPUDI, V., TERPACK, S. J., WHITE, C. L., 3RD, JOACHIMIAK, L. A. &  
1015 DIAMOND, M. I. 2022. Seed-competent tau monomer initiates pathology in a tauopathy mouse  
1016 model. *J Biol Chem*, 298, 102163.
- 1017 MONZON-SANDOVAL, J., BURLACU, E., AGARWAL, D., HANDEL, A. E., WEI, L., DAVIS, J., COWLEY, S. A.,  
1018 CADER, M. Z. & WEBBER, C. 2022. Lipopolysaccharide distinctively alters human microglia  
1019 transcriptomes to resemble microglia from Alzheimer's disease mouse models. *Dis Model Mech*,  
1020 15.
- 1021 MORGAN, A. P. 2015. argyle: An R Package for Analysis of Illumina Genotyping Arrays. *G3 (Bethesda)*, 6,  
1022 281-6.
- 1023 MORGAN, A. P., FU, C. P., KAO, C. Y., WELSH, C. E., DIDION, J. P., YADGARY, L., HYACINTH, L., FERRIS, M.  
1024 T., BELL, T. A., MILLER, D. R., GIUSTI-RODRIGUEZ, P., NONNEMAN, R. J., COOK, K. D., WHITMIRE,  
1025 J. K., GRALINSKI, L. E., KELLER, M., ATTIE, A. D., CHURCHILL, G. A., PETKOV, P., SULLIVAN, P. F.,  
1026 BRENNAN, J. R., MCMILLAN, L. & PARDO-MANUEL DE VILLENA, F. 2015. The Mouse Universal  
1027 Genotyping Array: From Substrains to Subspecies. *G3 (Bethesda)*, 6, 263-79.
- 1028 MOUSE GENOME SEQUENCING, C., WATERSTON, R. H., LINDBLAD-TOH, K., BIRNEY, E., ROGERS, J.,  
1029 ABRIL, J. F., AGARWAL, P., AGARWALA, R., AINSCOUGH, R., ALEXANDERSSON, M., AN, P.,  
1030 ANTONARAKIS, S. E., ATTWOOD, J., BAERTSCH, R., BAILEY, J., BARLOW, K., BECK, S., BERRY, E.,  
1031 BIRREN, B., BLOOM, T., BORK, P., BOTCHERBY, M., BRAY, N., BRENT, M. R., BROWN, D. G.,  
1032 BROWN, S. D., BULT, C., BURTON, J., BUTLER, J., CAMPBELL, R. D., CARNINCI, P., CAWLEY, S.,  
1033 CHIAROMONTE, F., CHINWALLA, A. T., CHURCH, D. M., CLAMP, M., CLEE, C., COLLINS, F. S.,

1034 COOK, L. L., COPLEY, R. R., COULSON, A., COURONNE, O., CUFF, J., CURWEN, V., CUTTS, T., DALY,  
1035 M., DAVID, R., DAVIES, J., DELEHAUNTY, K. D., DERI, J., DERMITZAKIS, E. T., DEWEY, C., DICKENS,  
1036 N. J., DIEKHANS, M., DODGE, S., DUBCHAK, I., DUNN, D. M., EDDY, S. R., ELNITSKI, L., EMES, R. D.,  
1037 ESWARA, P., EYRAS, E., FELSENFELD, A., FEWELL, G. A., FLICEK, P., FOLEY, K., FRANKEL, W. N.,  
1038 FULTON, L. A., FULTON, R. S., FUREY, T. S., GAGE, D., GIBBS, R. A., GLUSMAN, G., GNERRE, S.,  
1039 GOLDMAN, N., GOODSTADT, L., GRAFHAM, D., GRAVES, T. A., GREEN, E. D., GREGORY, S.,  
1040 GUIGO, R., GUYER, M., HARDISON, R. C., HAUSSLER, D., HAYASHIZAKI, Y., HILLIER, L. W.,  
1041 HINRICHS, A., HLAVINA, W., HOLZER, T., HSU, F., HUA, A., HUBBARD, T., HUNT, A., JACKSON, I.,  
1042 JAFFE, D. B., JOHNSON, L. S., JONES, M., JONES, T. A., JOY, A., KAMAL, M., et al. 2002. Initial  
1043 sequencing and comparative analysis of the mouse genome. *Nature*, 420, 520-62.

1044 ONOS, K. D., QUINNEY, S. K., JONES, D. R., MASTERS, A. R., PANDEY, R., KEEZER, K. J., BIESDORF, C.,  
1045 METZGER, I. F., MEYERS, J. A., PETERS, J., PERSON, S. C., MCCARTHY, B. P., BEDWELL, A. A.,  
1046 FIGUEIREDO, L. L., COPE, Z. A., SASNER, M., HOWELL, G. R., WILLIAMS, H. M., OBLAK, A. L.,  
1047 LAMB, B. T., CARTER, G. W., RIZZO, S. J. S. & TERRITO, P. R. 2022. Pharmacokinetic,  
1048 pharmacodynamic, and transcriptomic analysis of chronic levetiracetam treatment in 5XFAD  
1049 mice: A MODEL-AD preclinical testing core study. *Alzheimers Dement (N Y)*, 8, e12329.

1050 ONOS, K. D., UYAR, A., KEEZER, K. J., JACKSON, H. M., PREUSS, C., ACKLIN, C. J., O'ROURKE, R.,  
1051 BUCHANAN, R., COSSETTE, T. L., SUKOFF RIZZO, S. J., SOTO, I., CARTER, G. W. & HOWELL, G. R.  
1052 2019. Enhancing face validity of mouse models of Alzheimer's disease with natural genetic  
1053 variation. *PLoS Genet*, 15, e1008155.

1054 PAOLICELLI, R. C., SIERRA, A., STEVENS, B., TREMBLAY, M. E., AGUZZI, A., AJAMI, B., AMIT, I., AUDINAT,  
1055 E., BECHMANN, I., BENNETT, M., BENNETT, F., BESSIS, A., BIBER, K., BILBO, S., BLURTON-JONES,  
1056 M., BODDEKE, E., BRITES, D., BRONE, B., BROWN, G. C., BUTOVSKY, O., CARSON, M. J.,  
1057 CASTELLANO, B., COLONNA, M., COWLEY, S. A., CUNNINGHAM, C., DAVALOS, D., DE JAGER, P. L.,  
1058 DE STROOPER, B., DENES, A., EGGEN, B. J. L., EYO, U., GALEA, E., GAREL, S., GINHOUX, F., GLASS,  
1059 C. K., GOKCE, O., GOMEZ-NICOLA, D., GONZALEZ, B., GORDON, S., GRAEBER, M. B.,  
1060 GREENHALGH, A. D., GRESSENS, P., GRETER, M., GUTMANN, D. H., HAASS, C., HENEKA, M. T.,  
1061 HEPPNER, F. L., HONG, S., HUME, D. A., JUNG, S., KETTENMANN, H., KIPNIS, J., KOYAMA, R.,  
1062 LEMKE, G., LYNCH, M., MAJEWSKA, A., MALCANGIO, M., MALM, T., MANCUSO, R., MASUDA, T.,  
1063 MATTEOLI, M., MCCOLL, B. W., MIRON, V. E., MOLOFSKY, A. V., MONJE, M., MRACSKO, E.,  
1064 NADJAR, A., NEHER, J. J., NENISKYTE, U., NEUMANN, H., NODA, M., PENG, B., PERI, F., PERRY, V.  
1065 H., POPOVICH, P. G., PRIDANS, C., PRILLER, J., PRINZ, M., RAGOZZINO, D., RANSOHOFF, R. M.,  
1066 SALTER, M. W., SCHAEFER, A., SCHAFER, D. P., SCHWARTZ, M., SIMONS, M., SMITH, C. J., STREIT,  
1067 W. J., TAY, T. L., TSAI, L. H., VERKHRATSKY, A., VON BERNHARDI, R., WAKE, H., WITTAMER, V.,  
1068 WOLF, S. A., WU, L. J. & WYSS-CORAY, T. 2022. Microglia states and nomenclature: A field at its  
1069 crossroads. *Neuron*, 110, 3458-3483.

1070 PASSINI, M. A., WATSON, D. J., VITE, C. H., LANDSBURG, D. J., FEIGENBAUM, A. L. & WOLFE, J. H. 2003.  
1071 Intraventricular brain injection of adeno-associated virus type 1 (AAV1) in neonatal mice results  
1072 in complementary patterns of neuronal transduction to AAV2 and total long-term correction of  
1073 storage lesions in the brains of beta-glucuronidase-deficient mice. *J Virol*, 77, 7034-40.

1074 PEIRCE, J. L., LU, L., GU, J., SILVER, L. M. & WILLIAMS, R. W. 2004. A new set of BXD recombinant inbred  
1075 lines from advanced intercross populations in mice. *BMC Genet*, 5, 7.

1076 PENG, C., TROJANOWSKI, J. Q. & LEE, V. M. 2020. Protein transmission in neurodegenerative disease.  
1077 *Nat Rev Neurol*, 16, 199-212.

1078 POORKAJ, P., BIRD, T. D., WIJSMAN, E., NEMENS, E., GARRUTO, R. M., ANDERSON, L., ANDREADIS, A.,  
1079 WIEDERHOLT, W. C., RASKIND, M. & SCHELLENBERG, G. D. 1998. Tau is a candidate gene for  
1080 chromosome 17 frontotemporal dementia. *Ann Neurol*, 43, 815-25.

- 1081 RAUCH, J. N., LUNA, G., GUZMAN, E., AUDOUARD, M., CHALLIS, C., SIBIH, Y. E., LESHUK, C., HERNANDEZ,  
1082 I., WEGMANN, S., HYMAN, B. T., GRADINARU, V., KAMPMANN, M. & KOSIK, K. S. 2020. LRP1 is a  
1083 master regulator of tau uptake and spread. *Nature*, 580, 381-385.
- 1084 SANTACRUZ, K., LEWIS, J., SPIRES, T., PAULSON, J., KOTILINEK, L., INGELSSON, M., GUIMARAES, A.,  
1085 DETURE, M., RAMSDEN, M., MCGOWAN, E., FORSTER, C., YUE, M., ORNE, J., JANUS, C.,  
1086 MARIASH, A., KUSKOWSKI, M., HYMAN, B., HUTTON, M. & ASHE, K. H. 2005. Tau suppression in  
1087 a neurodegenerative mouse model improves memory function. *Science*, 309, 476-81.
- 1088 SARSANI, V. K., RAGHUPATHY, N., FIDDES, I. T., ARMSTRONG, J., THIBAUD-NISSEN, F., ZINDER, O.,  
1089 BOLISSETY, M., HOWE, K., HINERFELD, D., RUAN, X., ROWE, L., BARTER, M., ANANDA, G., PATEN,  
1090 B., WEINSTOCK, G. M., CHURCHILL, G. A., WILES, M. V., SCHNEIDER, V. A., SRIVASTAVA, A. &  
1091 REINHOLDT, L. G. 2019. The Genome of C57BL/6J "Eve", the Mother of the Laboratory Mouse  
1092 Genome Reference Strain. *G3 (Bethesda)*, 9, 1795-1805.
- 1093 SCHOCH, K. M., EZERSKIY, L. A., MORHAUS, M. M., BANNON, R. N., SAUERBECK, A. D., SHABSOVICH, M.,  
1094 JAFAR-NEJAD, P., RIGO, F. & MILLER, T. M. 2021. Acute Trem2 reduction triggers increased  
1095 microglial phagocytosis, slowing amyloid deposition in mice. *Proc Natl Acad Sci U S A*, 118.
- 1096 SIERKSMA, A., LU, A., MANCUSO, R., FATTORELLI, N., THRUPP, N., SALTA, E., ZOCO, J., BLUM, D., BUEE,  
1097 L., DE STROOPER, B. & FIERIS, M. 2020. Novel Alzheimer risk genes determine the microglia  
1098 response to amyloid-beta but not to TAU pathology. *EMBO Mol Med*, 12, e10606.
- 1099 SIMON, M. M., GREENAWAY, S., WHITE, J. K., FUCHS, H., GAILUS-DURNER, V., WELLS, S., SORG, T.,  
1100 WONG, K., BEDU, E., CARTWRIGHT, E. J., DACQUIN, R., DJEBALI, S., ESTABEL, J., GRAW, J.,  
1101 INGHAM, N. J., JACKSON, I. J., LENGELING, A., MANDILLO, S., MARVEL, J., MEZIANE, H.,  
1102 PREITNER, F., PUK, O., ROUX, M., ADAMS, D. J., ATKINS, S., AYADI, A., BECKER, L., BLAKE, A.,  
1103 BROOKER, D., CATER, H., CHAMPY, M. F., COMBE, R., DANECEK, P., DI FENZA, A., GATES, H.,  
1104 GERDIN, A. K., GOLINI, E., HANCOCK, J. M., HANS, W., HOLTER, S. M., HOUGH, T., JURDIC, P.,  
1105 KEANE, T. M., MORGAN, H., MULLER, W., NEFF, F., NICHOLSON, G., PASCHE, B., ROBERSON, L.  
1106 A., ROZMAN, J., SANDERSON, M., SANTOS, L., SELLOUM, M., SHANNON, C., SOUTHWELL, A.,  
1107 TOCCHINI-VALENTINI, G. P., VANCOLLIE, V. E., WESTERBERG, H., WURST, W., ZI, M., YALCIN, B.,  
1108 RAMIREZ-SOLIS, R., STEEL, K. P., MALLON, A. M., DE ANGELIS, M. H., HERAULT, Y. & BROWN, S.  
1109 D. 2013. A comparative phenotypic and genomic analysis of C57BL/6J and C57BL/6N mouse  
1110 strains. *Genome Biol*, 14, R82.
- 1111 STOPSCHINSKI, B. E., DEL TREDICI, K., ESTILL-TERPACK, S. J., GHEBREMDEHIN, E., YU, F. F., BRAAK, H. &  
1112 DIAMOND, M. I. 2021. Anatomic survey of seeding in Alzheimer's disease brains reveals  
1113 unexpected patterns. *Acta Neuropathol Commun*, 9, 164.
- 1114 WEGMANN, S., BENNETT, R. E., AMARAL, A. S. & HYMAN, B. T. 2017. Studying tau protein propagation  
1115 and pathology in the mouse brain using adeno-associated viruses. *Methods Cell Biol*, 141, 307-  
1116 322.
- 1117 WOERMAN, A. L., PATEL, S., KAZMI, S. A., OEHLER, A., FREYMAN, Y., ESPIRITU, L., COTTER, R.,  
1118 CASTANEDA, J. A., OLSON, S. H. & PRUSINER, S. B. 2017. Kinetics of Human Mutant Tau Prion  
1119 Formation in the Brains of 2 Transgenic Mouse Lines. *JAMA Neurol*, 74, 1464-1472.
- 1120 YALCIN, B., WONG, K., AGAM, A., GOODSON, M., KEANE, T. M., GAN, X., NELLAKER, C., GOODSTADT, L.,  
1121 NICOD, J., BHOMRA, A., HERNANDEZ-PLIEGO, P., WHITLEY, H., CLEAK, J., DUTTON, R.,  
1122 JANOWITZ, D., MOTT, R., ADAMS, D. J. & FLINT, J. 2011. Sequence-based characterization of  
1123 structural variation in the mouse genome. *Nature*, 477, 326-9.
- 1124 YANAGISAWA, D., HAMEZAH, H. S., PAHRUDIN ARROZI, A. & TOOYAMA, I. 2021. Differential  
1125 accumulation of tau pathology between reciprocal F1 hybrids of rTg4510 mice. *Sci Rep*, 11,  
1126 9623.
- 1127 YANG, H., WANG, J. R., DIDION, J. P., BUUS, R. J., BELL, T. A., WELSH, C. E., BONHOMME, F., YU, A. H.,  
1128 NACHMAN, M. W., PIALEK, J., TUCKER, P., BOURSOT, P., MCMILLAN, L., CHURCHILL, G. A. & DE



- 1129 VILLENA, F. P. 2011. Subspecific origin and haplotype diversity in the laboratory mouse. *Nat*  
1130 *Genet*, 43, 648-55.
- 1131 YANG, H. S., ONOS, K. D., CHOI, K., KEEZER, K. J., SKELLY, D. A., CARTER, G. W. & HOWELL, G. R. 2021.  
1132 Natural genetic variation determines microglia heterogeneity in wild-derived mouse models of  
1133 Alzheimer's disease. *Cell Rep*, 34, 108739.
- 1134 YOSHIYAMA, Y., HIGUCHI, M., ZHANG, B., HUANG, S. M., IWATA, N., SAIDO, T. C., MAEDA, J., SUHARA, T.,  
1135 TROJANOWSKI, J. Q. & LEE, V. M. 2007. Synapse loss and microglial activation precede tangles in  
1136 a P301S tauopathy mouse model. *Neuron*, 53, 337-51.
- 1137 ZHU, A., IBRAHIM, J. G. & LOVE, M. I. 2019. Heavy-tailed prior distributions for sequence count data:  
1138 removing the noise and preserving large differences. *Bioinformatics*, 35, 2084-2092.
- 1139

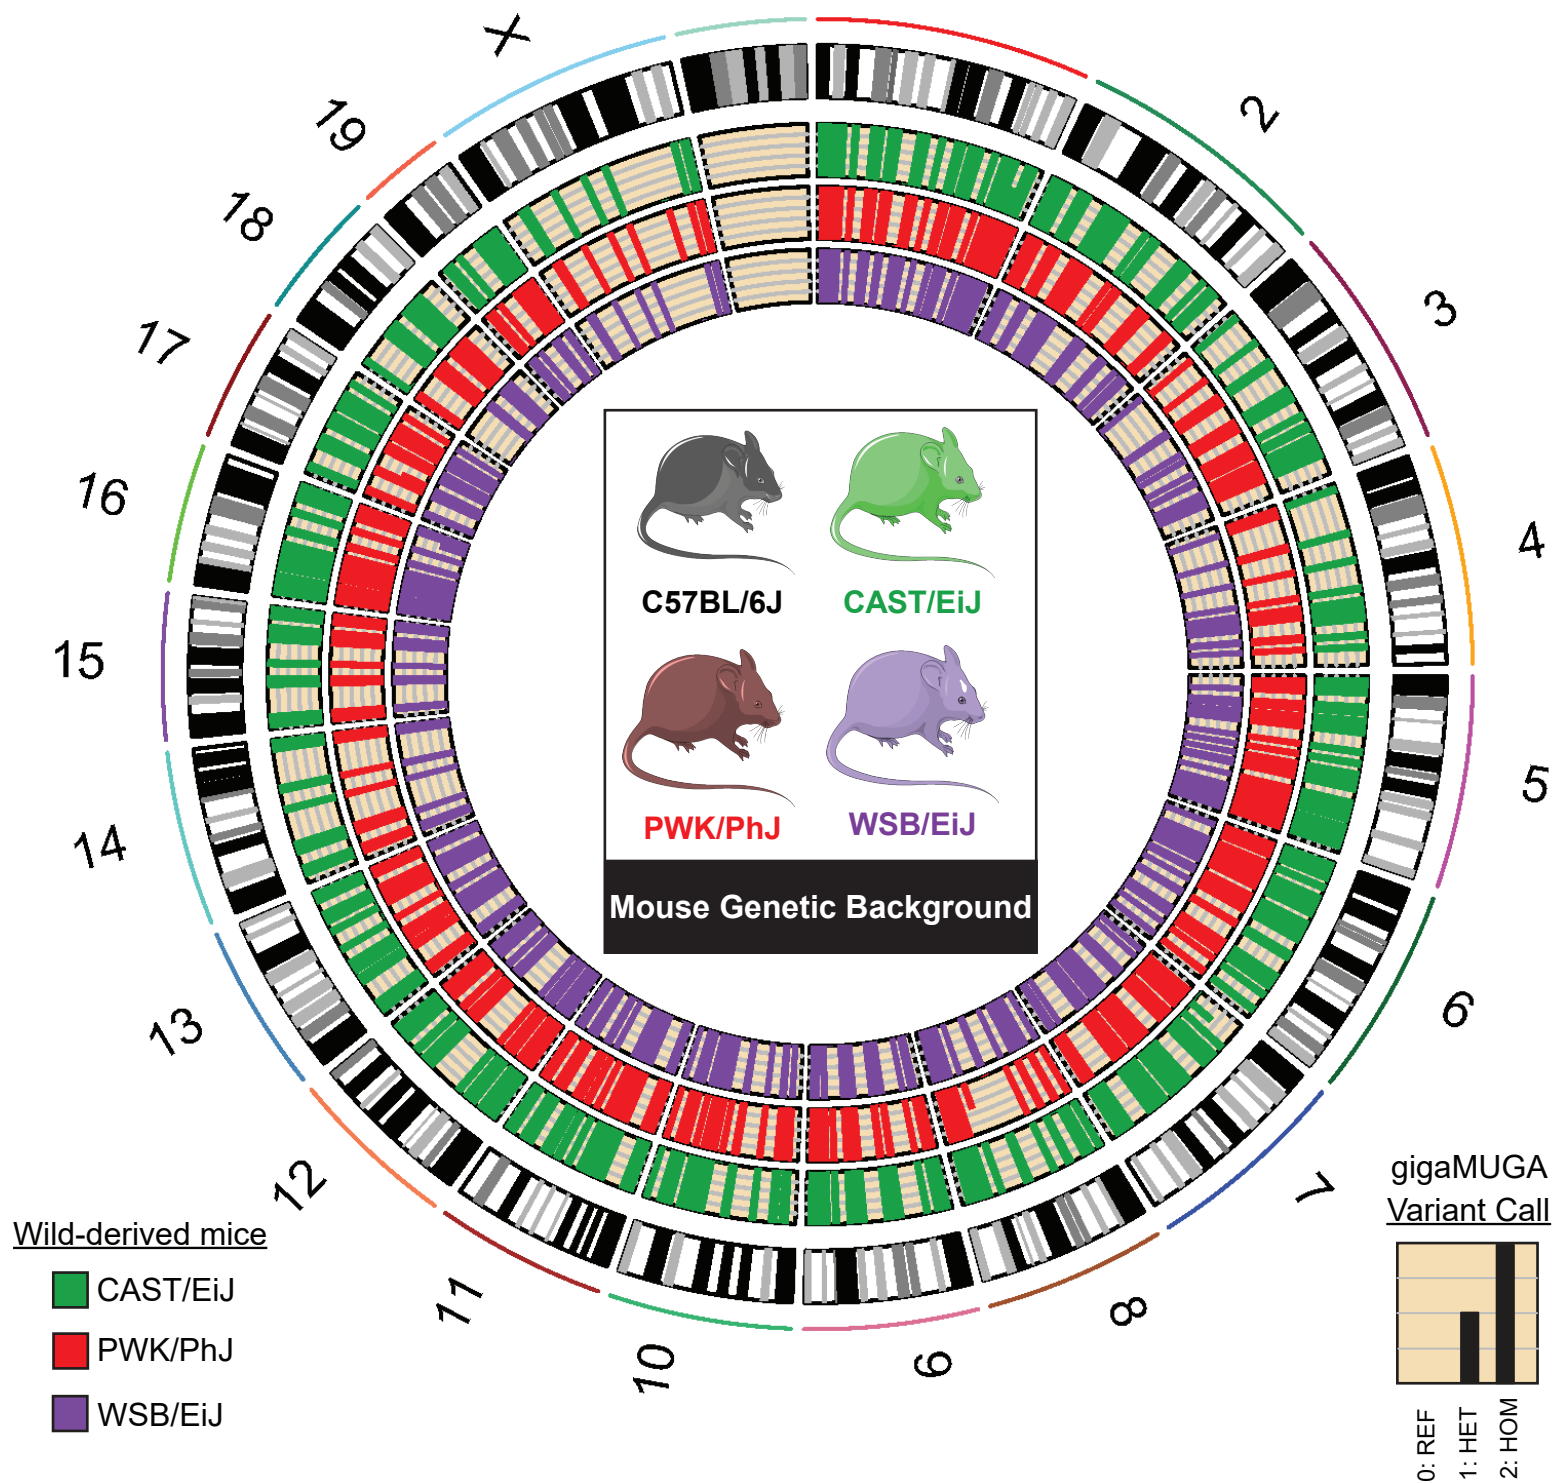

**Figure 1.** Variants in Wild-derived Genetic Backgrounds within AMP-AD Nominated Target Genes.

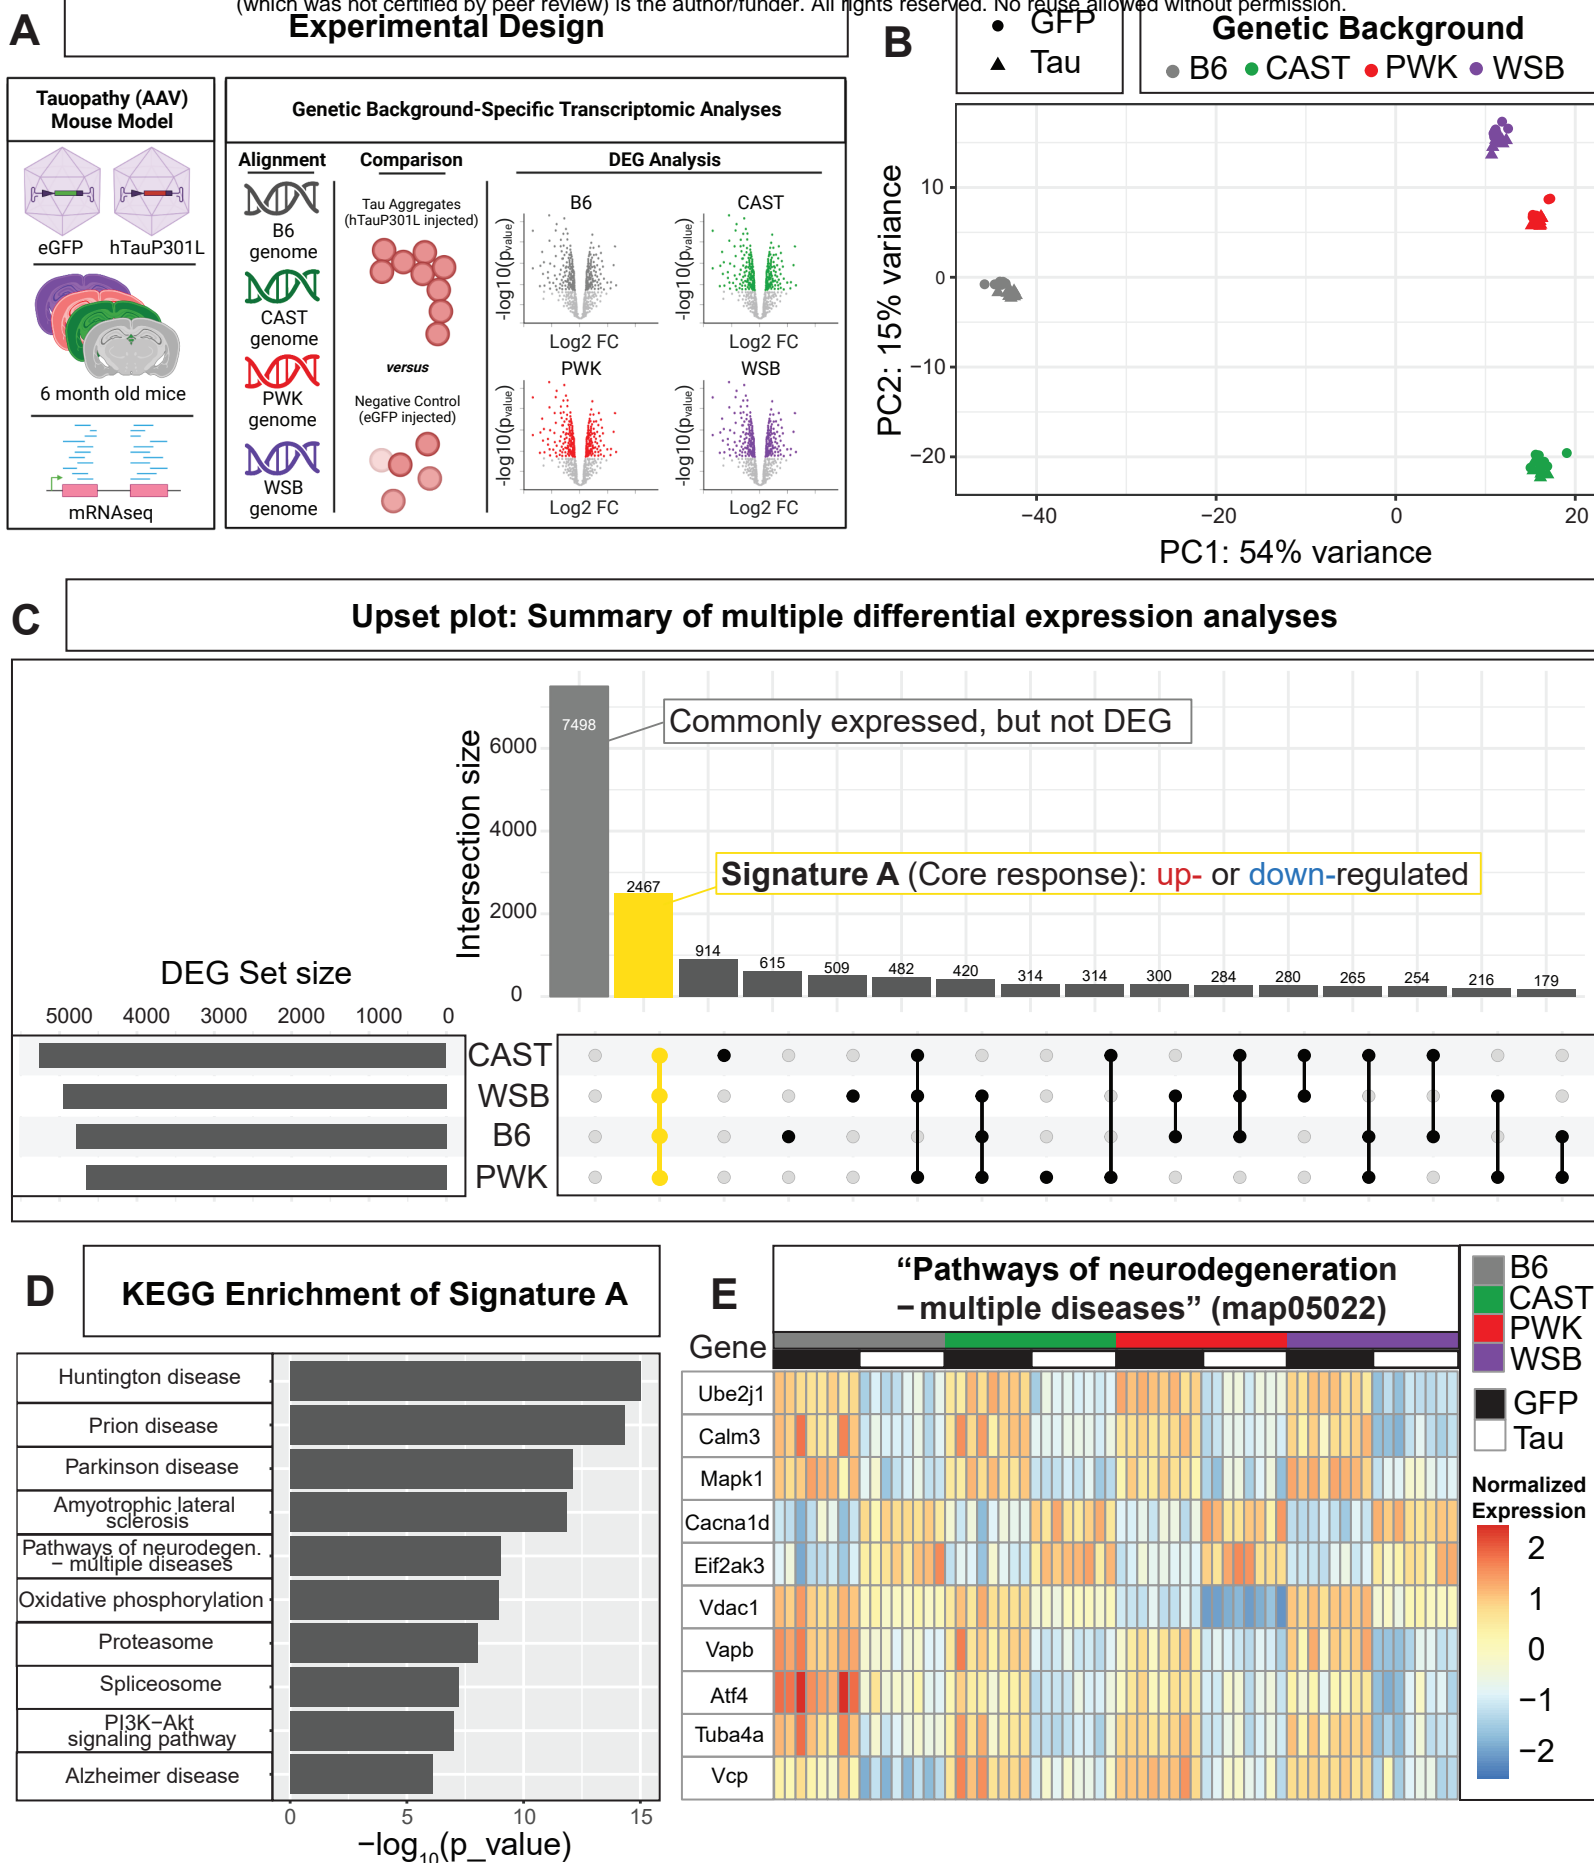

**Figure 2.** Signature A: Core Tau-responsive Signature Across Genetic Backgrounds

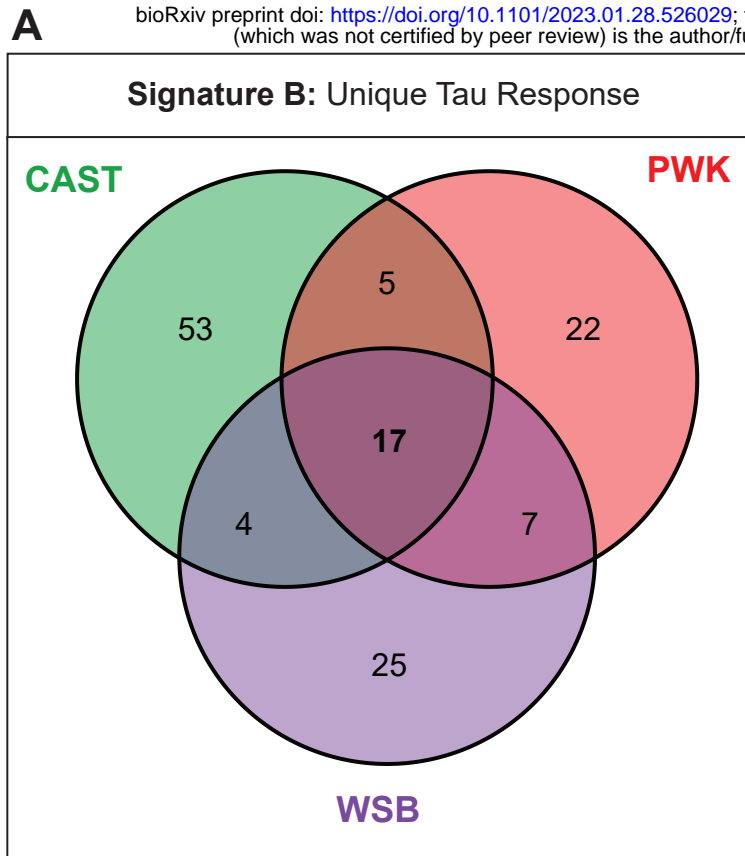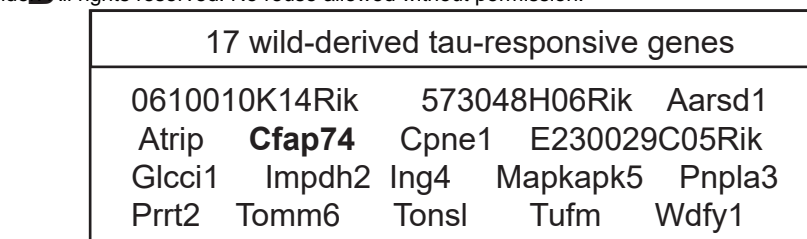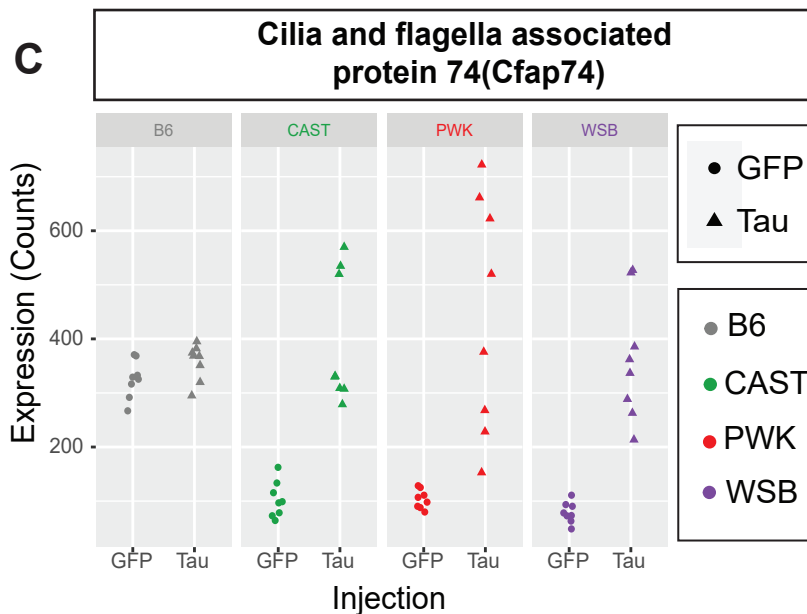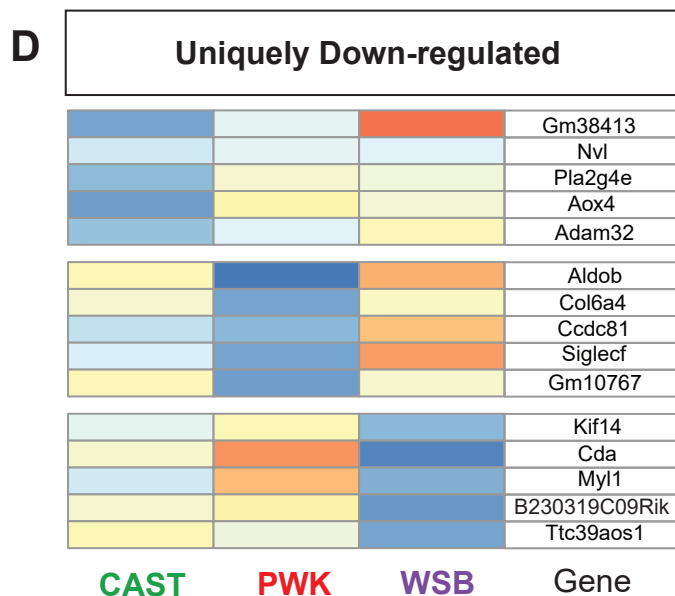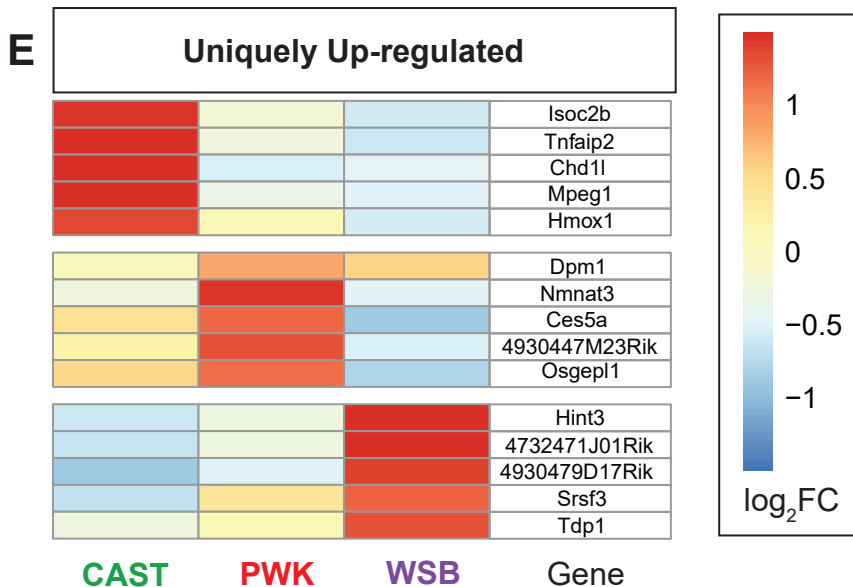

**Figure 3.** Signature B: Unique Tau-responsive Signatures in Wild-Derived Genetic Backgrounds

**A**

### Seeding Activity: Tau Biosensor Assay

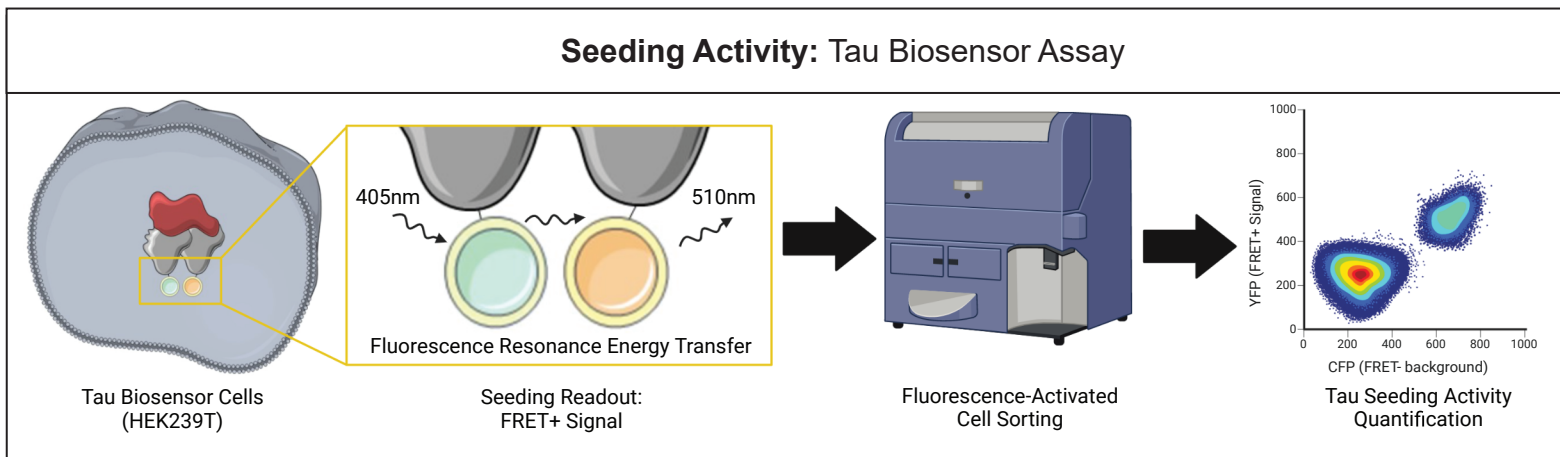

**B**

### Human Tau Expression

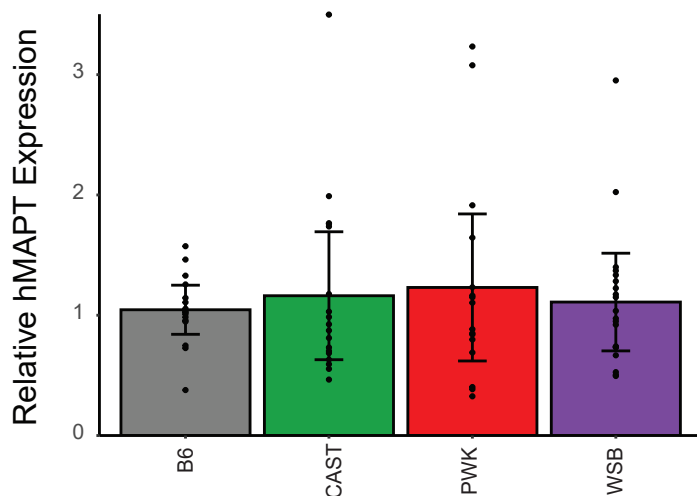

**C**

### Tau Seeding Activity

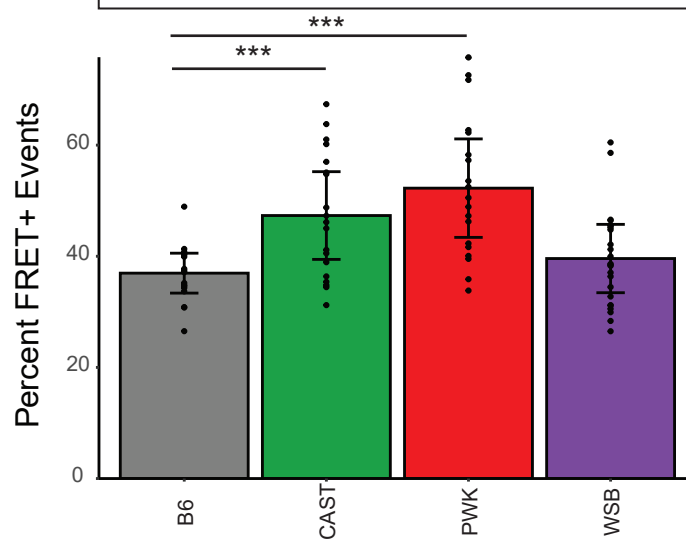

**Figure 4. Tau Seeding Activity is Modulated by Genetic Background Independent of Tau Expression**

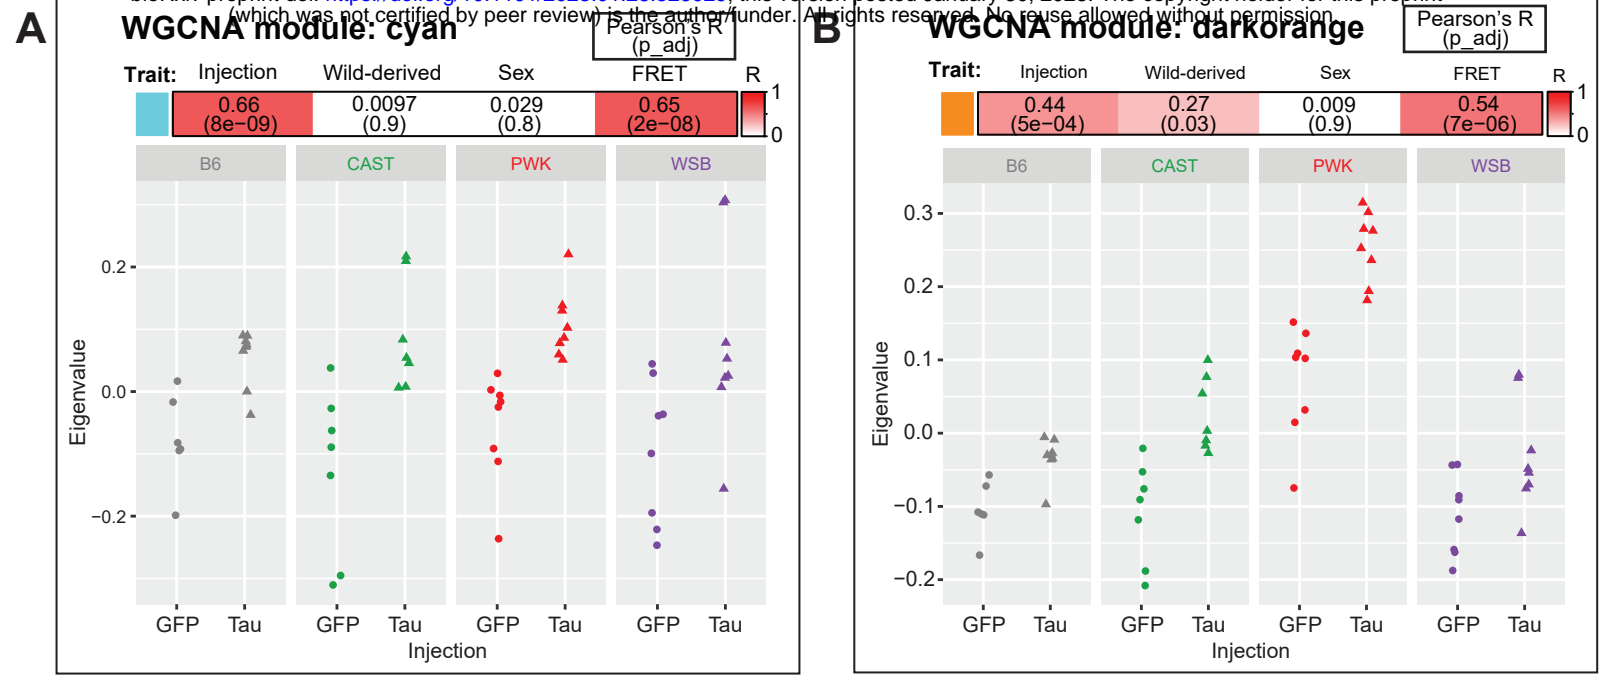

**C Signature C (darkorange module): Tau seeding-associated signature in shared in PWK and CAST strains**

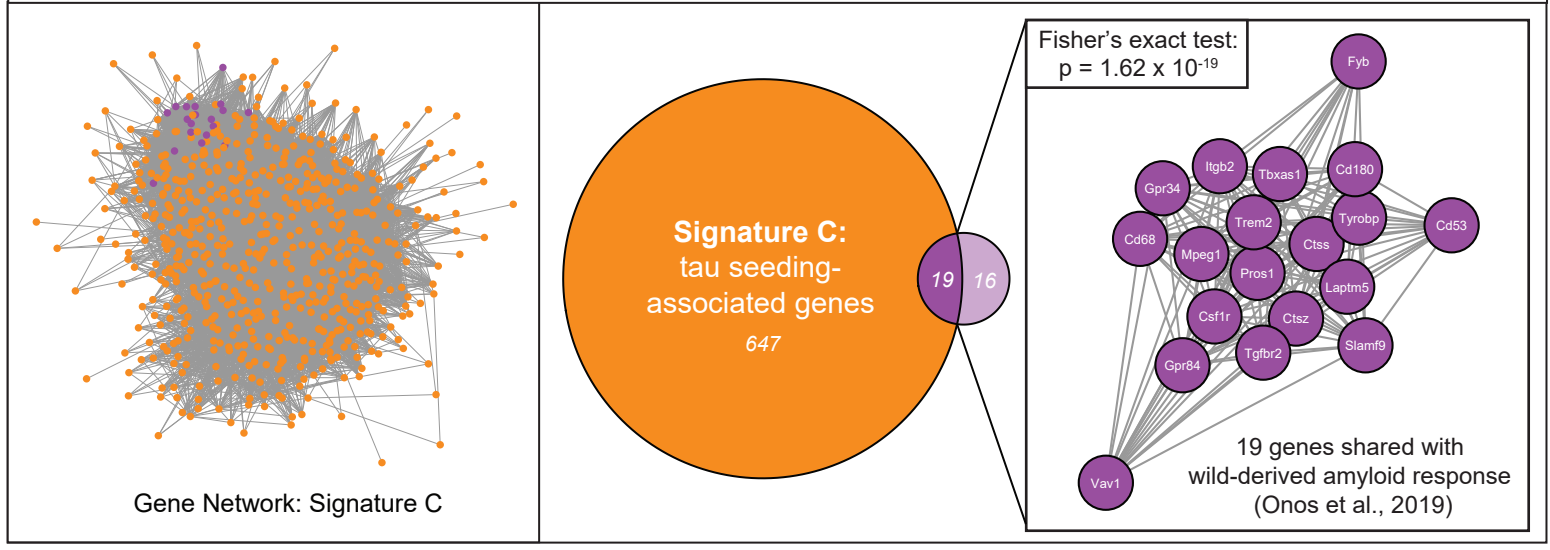

**D KEGG Enrichment of Signature C**

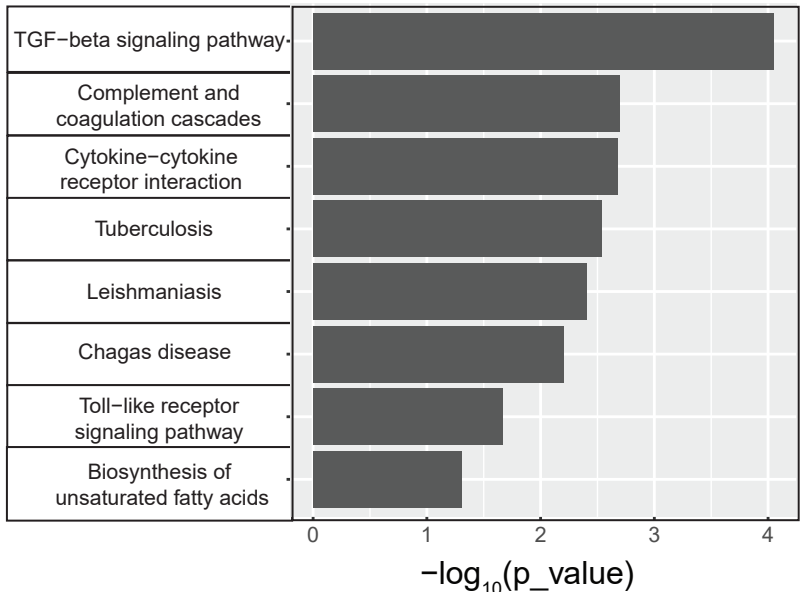

**E WikiPathways Enrichment of Signature C**

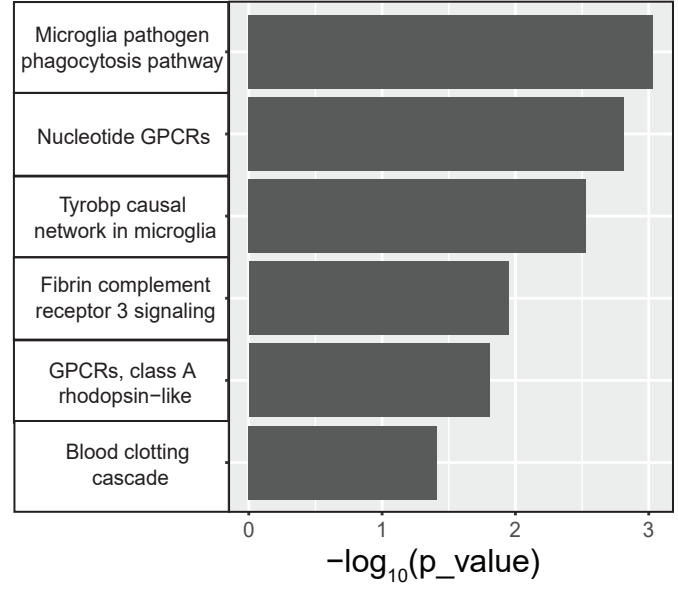

**Figure 5. Signature C: Tau Seeding-Associated Signature in PWK and CAST strains**

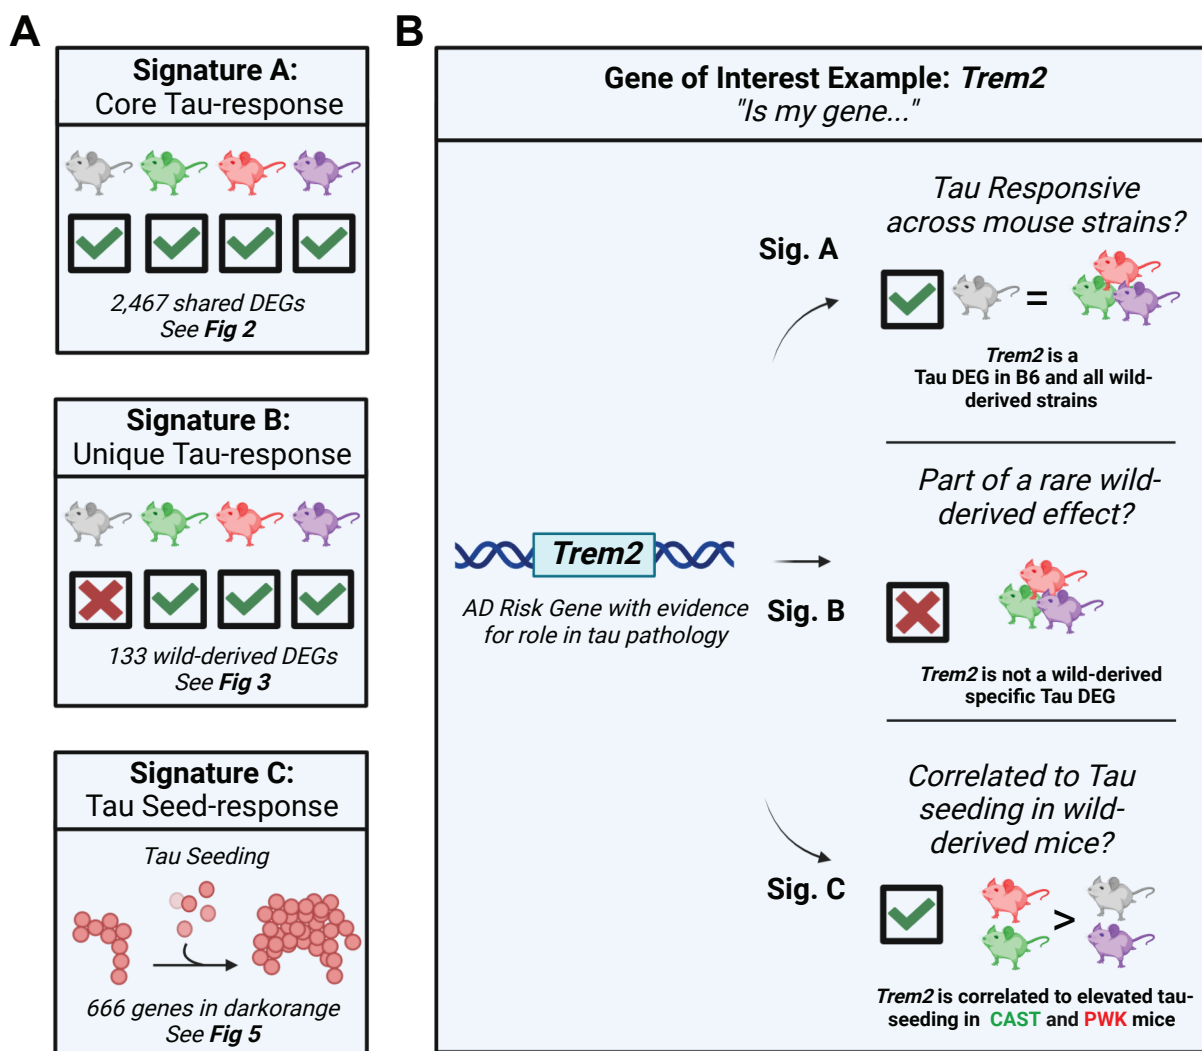

**Figure 6.** Resource: Guideline to Select A Mouse Genetic Background to Study Tau
